# Supplementary material for: Magnetic anisotropy of endohedral lanthanide ions: paramagnetic NMR study of MSc2N@C80-Ih with M running through the whole 4f row
Source: Royal Society of Chemistry journal article supplement (doi:10.1039/c5sc00154d), 2015-01-01
Supplement: c5sc00154d1.pdf [file c5sc00154d1.pdf]

# Magnetic Anisotropy of Endohedral Lanthanide Ions: Paramagnetic NMR Study of $MSc_2N@C_{80}-I_h$ with **M** running through the Whole 4f Row

Y. Zhang,<sup>a</sup> D. Krylov,<sup>a</sup> M. Rosenkranz,<sup>a</sup> S. Schiemenz,<sup>a</sup> A. A. Popov<sup>a\*</sup>

Leibniz Institute for Solid State and Materials Research, 01069 Dresden, Germany

## Electronic Supporting Information

|                                                                                                                                                        |    |
|--------------------------------------------------------------------------------------------------------------------------------------------------------|----|
| Synthesis and separation of selected <b>1M</b> molecules                                                                                               | 2  |
| Fitting of diamagnetic <sup>13</sup> C chemical shifts in <b>1Lu</b> , <b>1Y</b> , and <b>1La</b> by quadratic functions of ionic radius               | 12 |
| Temperature dependence of $T_2$ relaxation time for PHHJ carbons                                                                                       | 12 |
| Measured $T_1$ and $T_2$ relaxation times of PHHJ and THJ carbons in selected 1M molecules                                                             | 13 |
| Correlation between peak width and absolute paramagnetic shift for <sup>13</sup> C-PHHJ carbons                                                        | 13 |
| Correlations between $\delta_{ij}^{para} / \langle S_z \rangle_j$ and $C_j / \langle S_z \rangle_j$ for <sup>13</sup> C-THJ used in Reilley's approach | 14 |
| Diamagnetic chemical shifts estimated from $T^{-1}$ and $T^{-2}$ temperature dependences                                                               | 14 |
| Metal-nitrogen bond distances and QTAIM-computed atomic charges in DFT-optimized $MSc_2N@C_{80}$ molecules                                             | 15 |
| Ligand field splitting levels and their degeneracies in <b>1M</b> molecules                                                                            | 16 |
| Correlation between computed and experimental chemical pseudocontact shifts for <sup>13</sup> C-THJ                                                    | 19 |
| DFT-optimized Cartesian coordinates of $MSc_2N@C_{80}$ molecules                                                                                       | 20 |

## Synthesis of 1La

LaSc<sub>2</sub>N@C<sub>80</sub> was synthesized by a modified Krätschmer-Huffman dc-arc discharging method in our group. A mixture of La<sub>2</sub>O<sub>3</sub>, Sc<sub>2</sub>O<sub>3</sub>, guanidine thiocyanate (GT) and graphite powder (molar ratio of La/Sc/GT/C = 1:1:2.5:15) was packed into drilled graphite rods (100 mm in length and 8 mm in diameter). After arc discharging, the soot was pre-extracted with acetone for two hours to remove non-fullerene products and further Soxhlet extracted for 20 h with carbon disulphide. The isolation of LaSc<sub>2</sub>N@C<sub>80</sub> was performed by HPLC as described in Figure S1. Laser desorption time-of-flight mass-spectra were measured using Biflex III (Bruker, Germany).

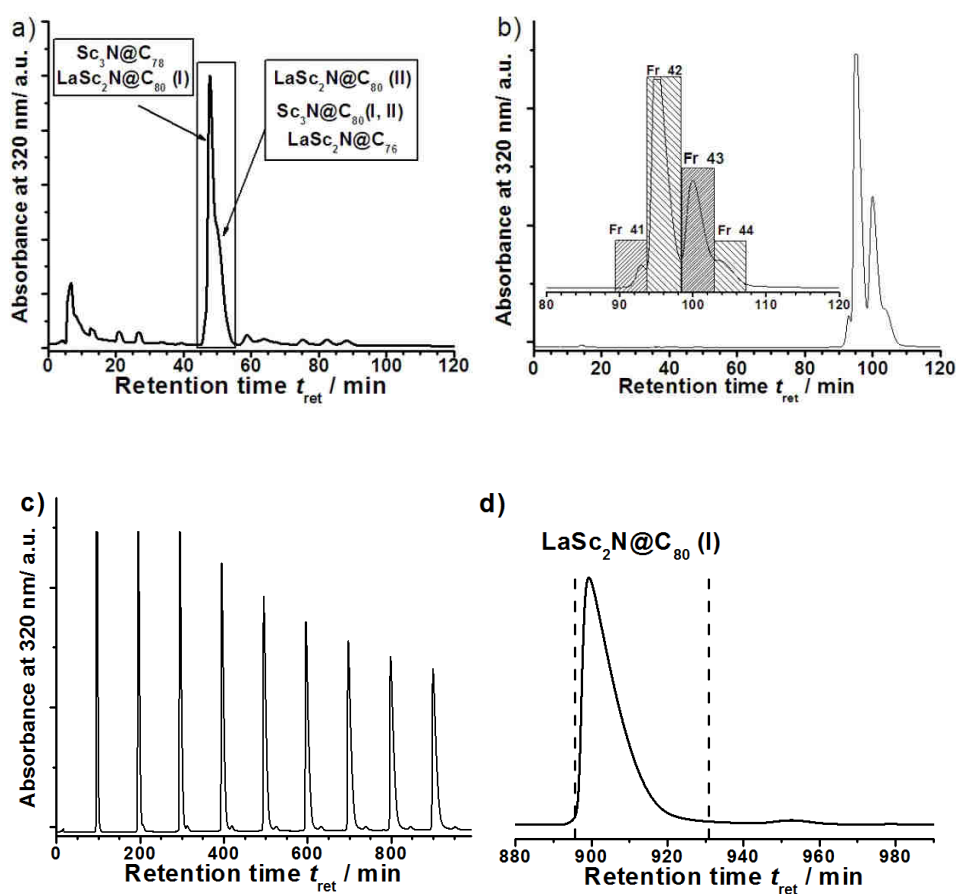

**Figure S1** Chromatogram of La<sub>x</sub>Sc<sub>3-x</sub>N@C<sub>2n</sub> (2n = 78-88) fullerene extract mixture (a 10×250 mm Buckyprep columns, flow rate 3.0 ml/min, injection volume 2 mL, toluene as mobile phase, 20 °C). (b) LaSc<sub>2</sub>N@C<sub>80</sub> (I) was firstly enriched in fraction 42. (c) LaSc<sub>2</sub>N@C<sub>80</sub> (I) was obtained by recycling HPLC after 9 cycles (10×250 mm Buckyprep column; flow rate 1.5 ml/min; injection volume is 4 ml; toluene as eluent, 20 °C); The enlarged views of 9<sup>th</sup> cycle from (c) is shown in (d), ( $t_{ret}$  = 880 - 990 min).

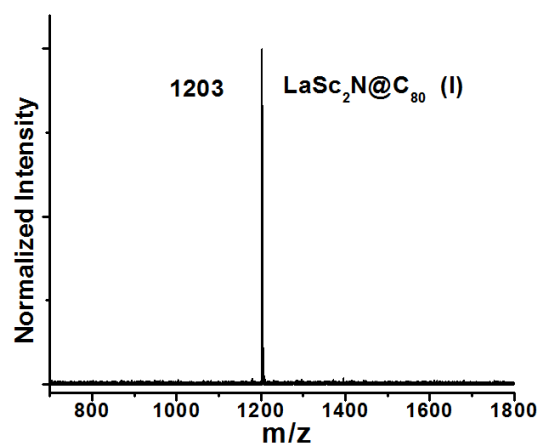

Figure S1 (continued). LDI-TOF Mass spectrum of **1La**

## Synthesis of 1Pr

Pr-Sc NCF mixture was synthesized using the same procedure as described for 1La.

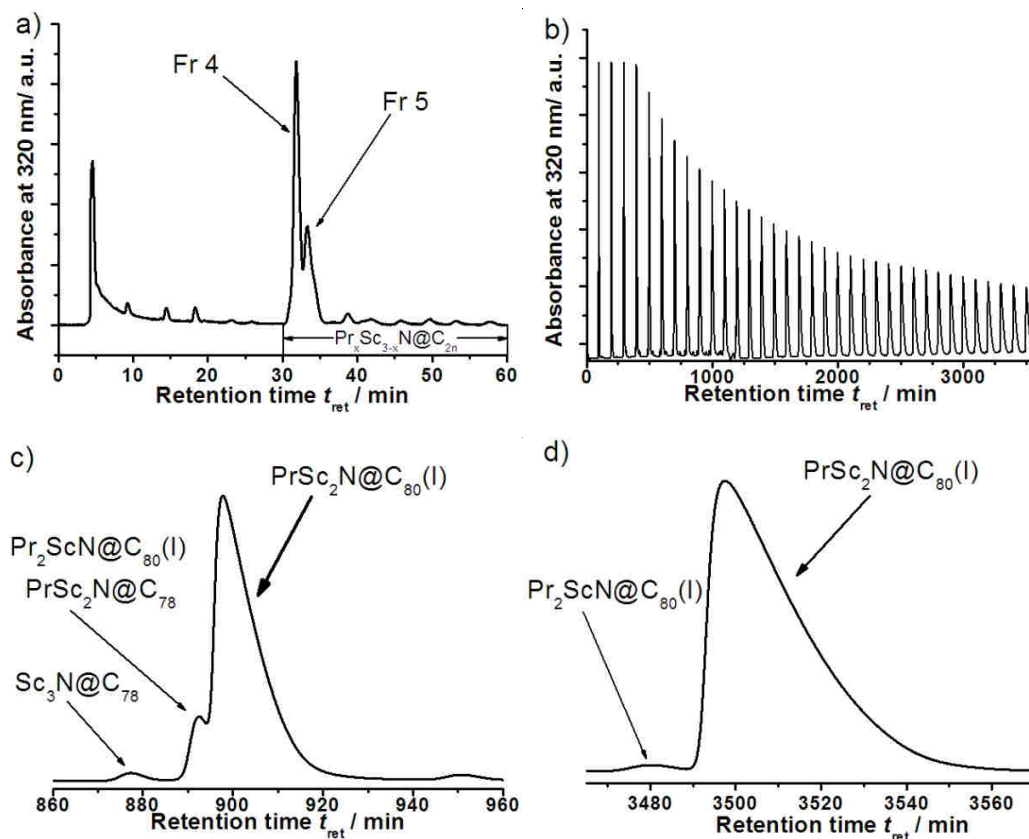

**Figure S2.** (a) Chromatogram of  $\text{Pr}_x\text{Sc}_{3-x}\text{N}@C_{2n}$  ( $2n = 78-88$ ) fullerene extract mixture (combination of two  $4.6 \times 250$  mm Buckyprep columns, flow rate 1.6 ml/min, injection volume 200  $\mu\text{L}$ , toluene as mobile phase, 40  $^\circ\text{C}$ ). (b)  $\text{PrSc}_2\text{N}@C_{80}(\text{I})$  was firstly enriched in fraction 4.  $\text{PrSc}_2\text{N}@C_{80}(\text{I})$  was obtained by recycling HPLC after 35 cycles (10  $\times$  250 mm Buckyprep column; flow rate 1.5 ml/min; injection volume is 5 ml; toluene as eluent); The enlarged views of 9<sup>th</sup> and 35<sup>th</sup> cycle from (b) are shown in (c) and (d) respectively, ( $t_{\text{ret}} = 860 - 960$  min and  $t_{\text{ret}} = 3465 - 3670$  min).

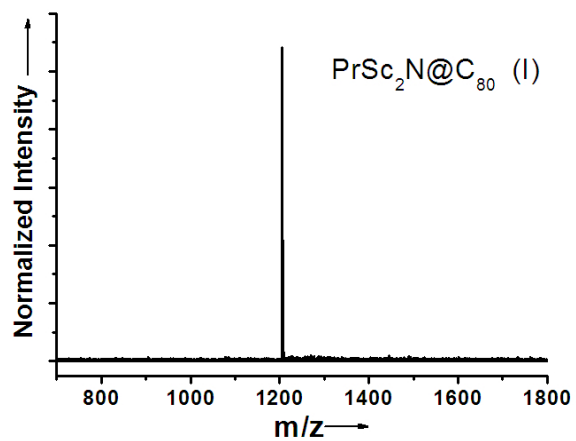

Figure S2 (continued). LDI-TOF Mass spectrum of **1Pr**

### Synthesis of 1Tb

Tb-Sc NCF mixture was synthesized using Sc : Tb : C = 1 : 1 : 15 ratio and NH<sub>3</sub> (20 mbar) as a reactive gas.

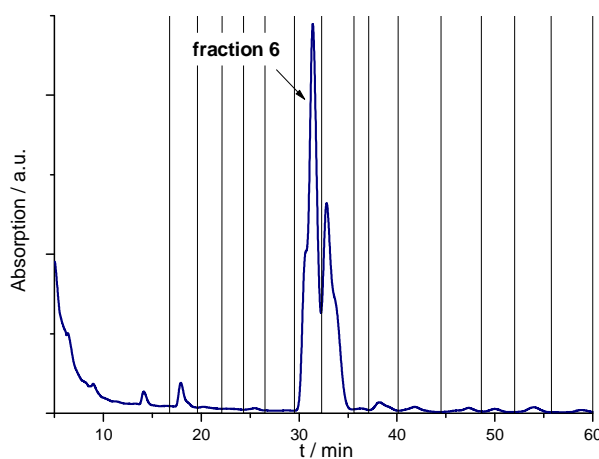

**Figure S3a.** Chromatogram of Tb<sub>x</sub>Sc<sub>3-x</sub>N@C<sub>2n</sub> (2n= 78-88) fullerene extract mixture (combination of two 4.6×250 mm Buckyprep columns, flow rate 1.6 ml/min, injection volume 0.8 ml, toluene as mobile phase, 40 °C).

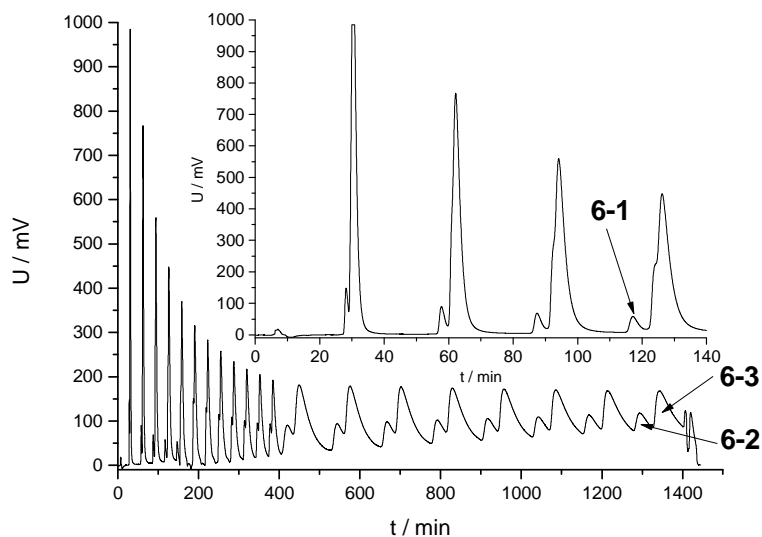

**Figure S3b.** Recycling-HPLC chromatography of the fraction 6, the inset shows cycles 1-4 (injection volume: 3,5 ml, flow rate: 3.0 ml/min for cycles 1 – 12 and 21; 0.78 ml/min for cycles 13 – 20). Column: Buckyprep-M 10 mm x 250 mm,  $\lambda = 320$  nm, temperature 23 °C, eluent: toluene). According to mass-spectral analysis, fraction **6-1** is Sc<sub>3</sub>N@C<sub>78</sub>, fraction **6-2** is mainly Tb<sub>2</sub>ScN@C<sub>80</sub>, and fraction **6-3** is TbSc<sub>2</sub>N@C<sub>80</sub>.

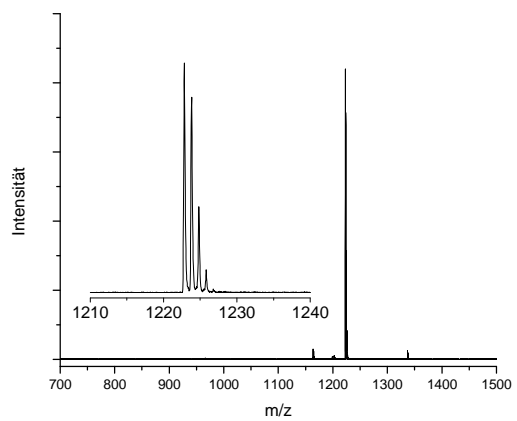

**Figure S3c.** Mass-spectrum of TbSc<sub>2</sub>N@C<sub>80</sub>

## Synthesis of 1Tm

Tm-Sc NCF mixture was synthesized using the same procedure as described for 1La.

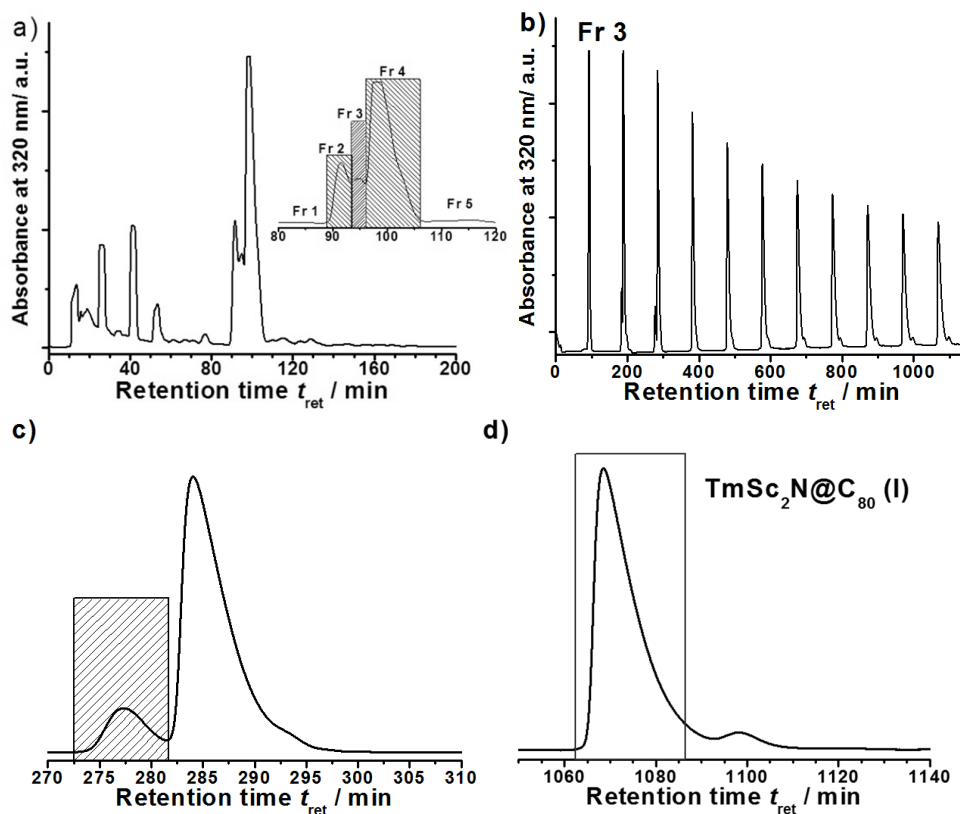

**Figure S4.** (a) Chromatogram of Tm<sub>x</sub>Sc<sub>3-x</sub>N@C<sub>2n</sub> (2n= 78-88) fullerene extract mixture (a 10×250 mm Buckyprep columns, flow rate 3.0 ml/min, injection volume 2 mL, toluene as mobile phase, 20 °C). (b) TmSc<sub>2</sub>N@C<sub>80</sub> (I) was firstly enriched in fraction 3. TmSc<sub>2</sub>N@C<sub>80</sub> (I) was obtained by recycling HPLC after 11 cycles (10×250 mm Buckyprep column; flow rate 1.5 ml/min; injection volume is 3 ml; toluene as eluent; 20 °C); The enlarged views of 3<sup>rd</sup> (to remove Tm<sub>2</sub>ScN@C<sub>80</sub> (I)) and 11<sup>st</sup> cycle (to remove Sc<sub>3</sub>N@C<sub>80</sub> (I)) from (b) are shown in (c) and (d) respectively, ( $t_{ret}$ = 270 - 310 min and  $t_{ret}$ = 1050 – 1140 min).



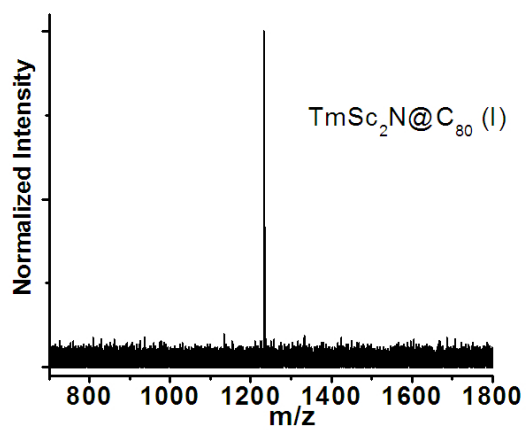

Figure S4 (continued). LDI-TOF Mass spectrum of **1Tm**

## Synthesis of 1Er

Er-Sc NCF mixture was synthesized using the same procedure as described for 1La.

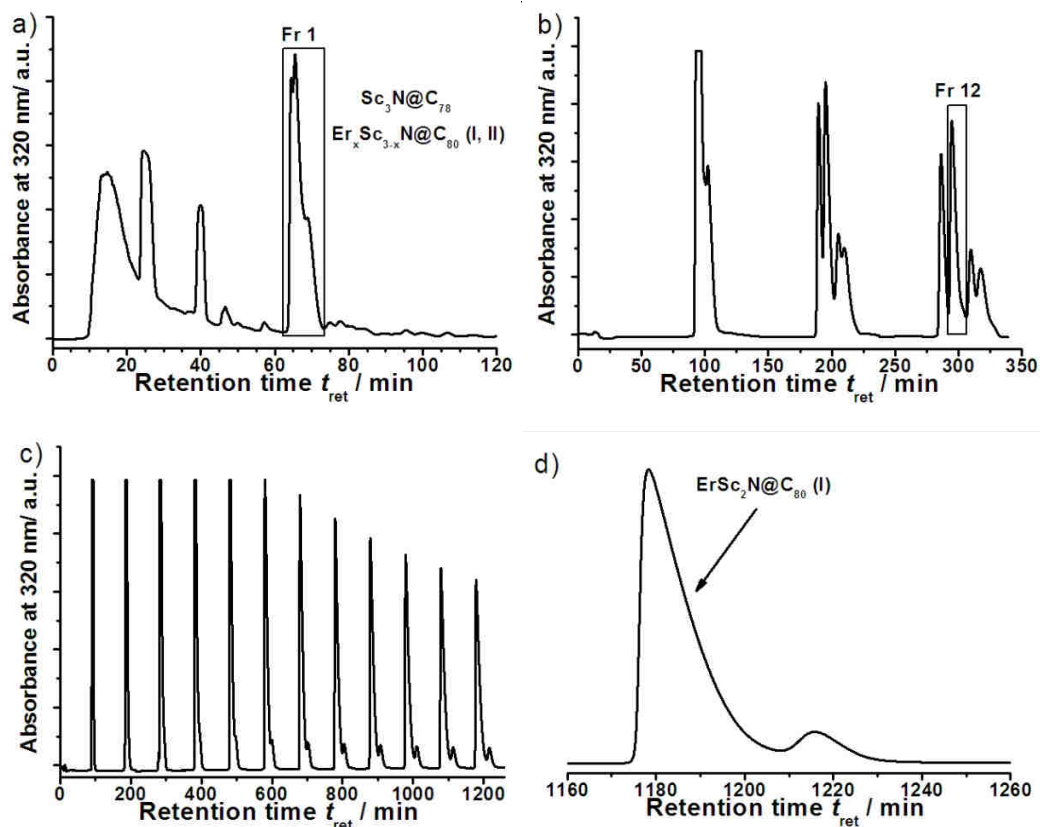

**Figure S5.** (a) Chromatogram of  $\text{Er}_x\text{Sc}_{3-x}\text{N}@C_{2n}$  ( $2n=78-88$ ) fullerene extract mixture which synthesized by the “SOS” method (a  $10\times 250$  mm Buckyprep columns, flow rate 2.0 ml/min, injection volume 2 mL, toluene as mobile phase,  $20^\circ\text{C}$ ). (b)  $\text{ErSc}_2\text{N}@C_{80}$  (I) was firstly enriched in fraction 1.  $\text{ErSc}_2\text{N}@C_{80}$  (I) was obtained by recycling HPLC after 12 cycles ( $10\times 250$  mm Buckyprep column; flow rate 1.5 ml/min; injection volume is 3 ml; toluene as eluent;  $20^\circ\text{C}$ ); The enlarged views of 12<sup>th</sup> cycle (to remove  $\text{Sc}_3\text{N}@C_{80}$  (I)) from (c) is shown in (d), ( $t_{\text{ret}}=1160-1260$  min).

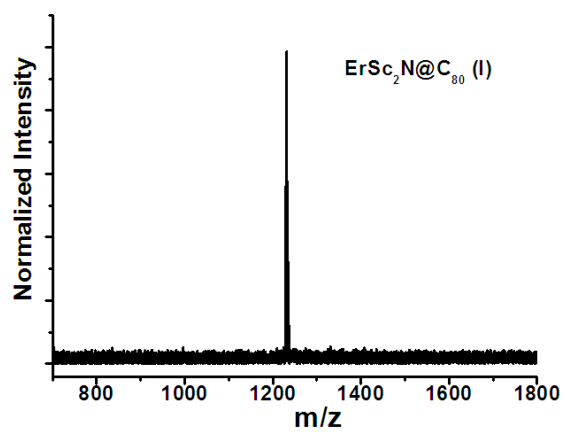

Figure S5 (continued). LDI-TOF Mass spectrum of **1Er**

### Estimation of $\delta^{\text{dia}}$ values

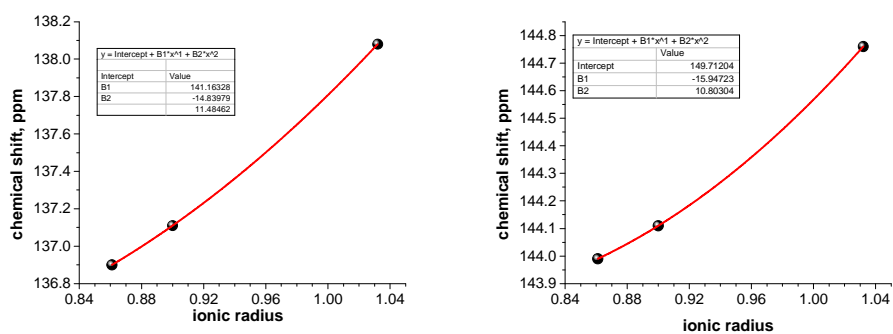

**Figure S6.** Fitting of diamagnetic  $^{13}\text{C}$  chemical shifts in **1Lu**, **1Y**, and **1La** (THJ – left, PHHJ - right) by quadratic functions of ionic radius.

### Relaxation times

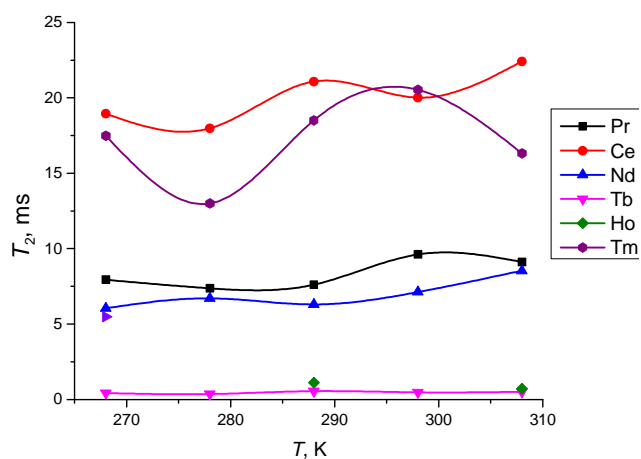

**Figure S7.** Temperature dependence of  $T_2$  relaxation time for PHHJ carbons estimated from the peak width.

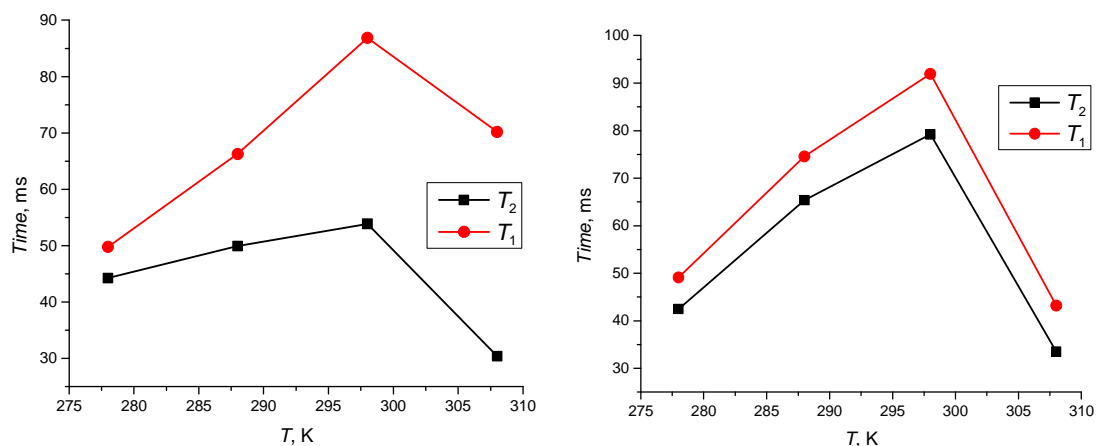

**Figure S8.**  $T_1$  and  $T_2$  relaxation times of PHHJ (left) and THJ (right) carbons in  $\text{TmSc}_2\text{N}@C_{80}$  measured by inversion recovery method ( $T_1$ ) and Carr-Purcell-Meiboom-Gill pulse sequence ( $T_2$ ).

**Selected  $T_1$  times (ms) measured by inversion recovery method at different temperatures:**

**1Nd, PHHJ:** 6.5 (278), 8.7 (288), 14.5 (298), 10.5 (308)

**1Pr, PHHJ:** 9.3 (298), 11.4 (308)

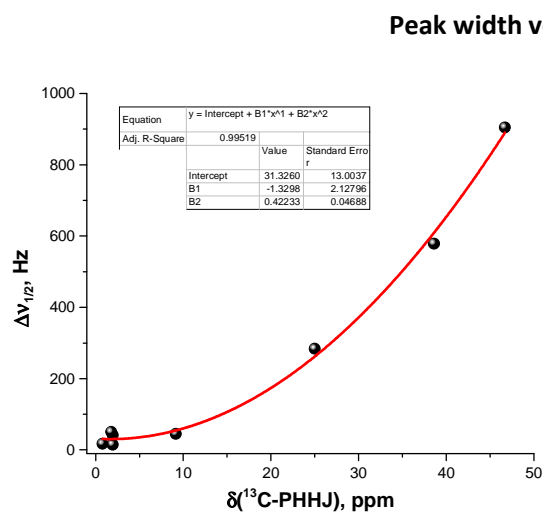

**Figure S9.** Correlation between peak width and absolute paramagnetic shift for  $^{13}\text{C}$ -PHHJ carbons

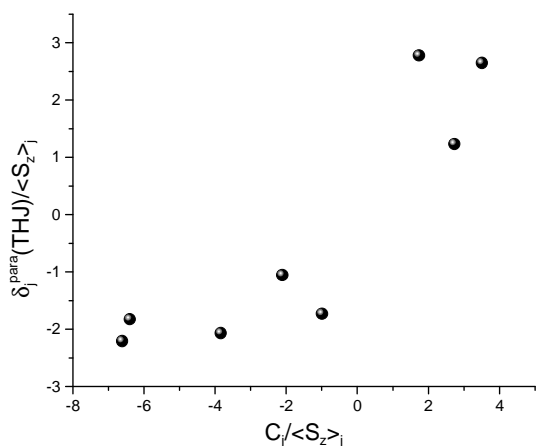

**Figure S10.** Correlations between  $\delta_{ij}^{\text{para}}/\langle S_z \rangle_j$  and  $C_j/\langle S_z \rangle_j$  for  $^{13}\text{C}$ -THJ used to distinguish contact and pseudocontact contributions in **1M** molecules by Reilley's approach. The lack of linear correlation does not allow us to use Reilley's approach for  $^{13}\text{C}$ -THJ carbons.

**Table S1.** Diamagnetic chemical shifts estimated from  $T^{-1}$  and  $T^{-2}$  temperature dependences of chemical shifts<sup>a</sup>

| <b>1M</b> | $^{13}\text{C}$ -PHHJ               |                               |                               | $^{13}\text{C}$ -THJ                |                               |                               | $^{45}\text{Sc}$ <sup>c</sup> |                               |
|-----------|-------------------------------------|-------------------------------|-------------------------------|-------------------------------------|-------------------------------|-------------------------------|-------------------------------|-------------------------------|
|           | $\delta^{\text{dia}}(\text{exp})^b$ | $\delta^{\text{dia}}(T^{-1})$ | $\delta^{\text{dia}}(T^{-2})$ | $\delta^{\text{dia}}(\text{exp})^b$ | $\delta^{\text{dia}}(T^{-1})$ | $\delta^{\text{dia}}(T^{-2})$ | $\delta^{\text{dia}}(T^{-1})$ | $\delta^{\text{dia}}(T^{-2})$ |
| Ce        | 144.63                              | 147.9                         | 145.3                         | 137.89                              | 139.8                         | 137.8                         | 135 <sup>d</sup>              | 190 <sup>d</sup>              |
| Pr        | 144.51                              | 147.7                         | 145.1                         | 137.73                              | 138.3                         | 135.0                         | 160                           | 308                           |
| Nd        | 144.47                              | 144.5                         | 143.6                         | 137.67                              | 140.6                         | 135.2                         | 255                           | 308                           |
| Tb        | 144.20                              | 167.8                         | 136.7                         | 137.25                              | 152.3                         | 125.1                         | -301                          | 327                           |
| Dy        | 144.15                              | 171.3                         | 134.6                         | 137.18                              | n/a                           | n/a                           | -188                          | 850                           |
| Ho        | 144.11                              | n/a                           | n/a                           | 137.12                              | n/a                           | n/a                           | -531 <sup>e</sup>             | 271 <sup>e</sup>              |
| Er        | 144.08                              | 138.01                        | 145.6                         | 137.05                              | 137.8                         | 142.0                         | 536                           | 149                           |
| Tm        | 144.04                              | 147.47                        | 146.2                         | 137.00                              | 130.87                        | 141.5                         | 246                           | 120                           |

<sup>a</sup> Estimation of  $\delta^{\text{dia}}$  from temperature dependence of chemical shifts is based the assumption that either contact or pseudocontact terms have predominant contribution; since these terms are expected to have  $T^{-1}$  or  $T^{-2}$  dependences, respectively, linearization of the equations  $\delta(T) = \delta^{\text{dia}} + \text{const} \cdot T^{-1}$  or  $\delta(T) = \delta^{\text{dia}} + \text{const} \cdot T^{-2}$  gives  $\delta^{\text{dia}}$  as an intercept; <sup>b</sup> diamagnetic shifts were estimated from the polynomial fit of the  $\delta(\mathbf{1M})$ -vs- $R(\text{M}^{3+})$  data for **1Y**, **1La**, and **1Lu**; <sup>c</sup> diamagnetic  $^{45}\text{Sc}$  chemical shift is  $\sim 200$  ppm; <sup>d</sup> from Wang *et al.*, *J. Am. Chem. Soc.* **2006**, *128*, 8884-8889; from Zhang *et al.*, *Chem. Eur. J.* **2012**, *18*, 9691 – 9698;

**Table S2.** Metal-nitrogen bond distances in DFT-optimized  $MSc_2N@C_{80}$  molecules ( $d$ , Å) and QTAIM-computed atomic charges ( $q$ ) used in point-charge calculations of the ligand field splitting

|           | $d$   |       |        |       | $q$   |        |       |       |        |        |        |        |
|-----------|-------|-------|--------|-------|-------|--------|-------|-------|--------|--------|--------|--------|
|           | M-N   | ScI-N | ScII-N | M-C1  | M     | N      | ScI   | ScII  | C1     | C2     | C3     | C4     |
| <b>La</b> | 2.241 | 1.927 | 1.931  | 2.542 | 1.873 | -1.654 | 1.710 | 1.704 | -0.094 | -0.094 | -0.063 | -0.087 |
| <b>Ce</b> | 2.233 | 1.932 | 1.935  | 2.524 | 1.865 | -1.655 | 1.712 | 1.706 | -0.095 | -0.095 | -0.064 | -0.088 |
| <b>Pr</b> | 2.225 | 1.936 | 1.939  | 2.508 | 1.858 | -1.656 | 1.713 | 1.707 | -0.096 | -0.096 | -0.065 | -0.088 |
| <b>Nd</b> | 2.217 | 1.939 | 1.942  | 2.493 | 1.851 | -1.657 | 1.714 | 1.708 | -0.098 | -0.096 | -0.066 | -0.089 |
| <b>Tb</b> | 2.179 | 1.958 | 1.961  | 2.428 | 1.932 | -1.704 | 1.723 | 1.718 | -0.106 | -0.107 | -0.078 | -0.102 |
| <b>Dy</b> | 2.173 | 1.961 | 1.964  | 2.416 | 1.928 | -1.705 | 1.724 | 1.719 | -0.107 | -0.108 | -0.080 | -0.102 |
| <b>Ho</b> | 2.163 | 1.966 | 1.968  | 2.405 | 1.924 | -1.706 | 1.725 | 1.720 | -0.108 | -0.109 | -0.080 | -0.103 |
| <b>Er</b> | 2.155 | 1.970 | 1.972  | 2.394 | 1.920 | -1.706 | 1.726 | 1.721 | -0.109 | -0.109 | -0.081 | -0.104 |
| <b>Tm</b> | 2.147 | 1.974 | 1.976  | 2.384 | 1.916 | -1.707 | 1.727 | 1.722 | -0.110 | -0.110 | -0.082 | -0.104 |
| <b>Lu</b> | 2.133 | 1.978 | 1.981  | 2.384 | 1.918 | -1.709 | 1.730 | 1.726 | -0.111 | -0.111 | -0.083 | -0.105 |

See Figure 1 in the manuscript for the numbering of carbon atoms

### Calculations of the ligand field splitting

Ligand field splitting was computed using QTAIM charges listed in Table S2. To verify reliability of such calculations, we compared the energy levels with those computed ab initio at the CASSCF level from [Chibotaru *et al. J. Phys. Chem. Lett.* **2013**, *4*, 3565]. We used the set of values computed with extended basis set (“basis set 2” in original publication) and the same B3LYP-optimized coordinates as used in this work (in their computations Chibotaru *et al.* used Cartesian coordinates provided by our group).

In the point charge model, atomic (or other) charges are used to model the ligand field. Unfortunately, “atomic charge” is not well defined parameter in quantum chemistry – there are dozens of ways how atomic charges can be computed, with very different results. We prefer to use Bader (aka QTAIM) charges which are obtained by integration of the electron density over atomic basins. As such, QTAIM charges are stable with respect to the variation of the basis set and wavefunction method. Therefore, the scaling factor we used to reduce the charges has no solid physical meaning and should be considered merely as a fitting parameter. Namely, when QTAIM charges are scaled by 0.754 and used in the point charge model, good agreement with ab initio computed LF splitting is obtained (Table S3). It is known that QTAIM usually provides more ionic description of the systems than other approaches (such as Mulliken, Hirschfeld, etc). Thus, the use of, say, Mulliken charges would probably require completely different scaling factor.

Point charge model enables simple evaluation of the importance of different parts of the molecule in the ligand field. To analyze this, we computed LF levels with several structural models. First, we used N, Sc, and four carbon atoms. The only N and Sc ions were considered. Finally, only the nitride ion was left. Atomic charges were the same in all calculations. The LF levels are listed in Table S3. It can be seen that Dy-N system overestimates the splitting. Yet, this is fairly uniform overestimation, and the qualitative description is similar to that of the more realistic models. Addition of Sc ions overcorrects the level energies: they are now smaller than in the full model. Anyway, it can be seen that the effect of the nitride is considerably larger than that of Sc ions. Addition of 4 closest carbon atoms has noticeable but not dramatic effect: the values are slightly increased by ca 12% in comparison to the N+2Sc model. Thus, we can conclude that the nitride ions has the largest effect on the ligand field, and hence the LF is almost uniaxial; energy levels computed only with N are 23-25% high in energy that the model including Sc and carbons. Sc reduces the symmetry, and down-scales the energy levels by ca 40%; the values for N+2Sc model are 11-12% smaller than the model with carbon atoms. Thus, the large anisotropy is the result of the highly charged nitride ion located close to the lanthanide.

**Table S3.** LF levels ( $\text{cm}^{-1}$ ) in  $\text{DySc}_2\text{N}@C_{80}$  computed with different charge models

| CASSCF <sup>a</sup> | PCM      |       |      |
|---------------------|----------|-------|------|
|                     | N+2Sc+4C | N+2Sc | N    |
| 0                   | 0        | 0     | 0    |
| 372                 | 382      | 340   | 469  |
| 729                 | 699      | 621   | 860  |
| 1009                | 944      | 837   | 1168 |
| 1180                | 1121     | 990   | 1396 |
| 1268                | 1236     | 1086  | 1555 |
| 1338                | 1309     | 1153  | 1653 |
| 1401                | 1401     | 1240  | 1701 |

<sup>a</sup> from [Chibotaru *et al. J. Phys. Chem. Lett.* **2013**, *4*, 3565]



**Table S4. Ligand field splitting levels (cm<sup>-1</sup>) in 1M molecules, their degeneracies, and description in terms of  $|\pm m_j\rangle$  basis functions (contributions less than 0.05 are not shown)**

|           |   |      |                                                                 |
|-----------|---|------|-----------------------------------------------------------------|
| <b>Ce</b> |   |      |                                                                 |
| 0.0       | 2 | 0.99 | $ \pm 5/2\rangle$                                               |
| 1074.6    | 2 | 0.98 | $ \pm 3/2\rangle$                                               |
| 1914.6    | 2 | 0.99 | $ \pm 1/2\rangle$                                               |
| <b>Pr</b> |   |      |                                                                 |
| 0.0       | 2 | 1.00 | $ \pm 4\rangle$                                                 |
| 849.3     | 1 | 0.99 | $ \pm 3\rangle$                                                 |
| 850.2     | 1 | 0.99 | $ \pm 3\rangle$                                                 |
| 1358.8    | 1 | 0.90 | $ \pm 2\rangle + 0.09  0\rangle$                                |
| 1389.3    | 1 | 0.99 | $ \pm 2\rangle$                                                 |
| 1544.3    | 1 | 0.99 | $ \pm 1\rangle$                                                 |
| 1679.4    | 1 | 0.93 | $ \pm 1\rangle$                                                 |
| 1686.8    | 1 | 0.85 | $ 0\rangle + 0.08  \pm 2\rangle + 0.06  \pm 1\rangle$           |
| <b>Nd</b> |   |      |                                                                 |
| 0.0       | 2 | 1.00 | $ \pm 9/2\rangle$                                               |
| 363.8     | 2 | 0.99 | $ \pm 7/2\rangle$                                               |
| 497.0     | 2 | 0.97 | $ \pm 5/2\rangle$                                               |
| 591.8     | 2 | 0.90 | $ \pm 3/2\rangle + 0.09  \pm 1/2\rangle$                        |
| 674.7     | 2 | 0.89 | $ \pm 1/2\rangle + 0.09  \pm 3/2\rangle$                        |
| <b>Tb</b> |   |      |                                                                 |
| 0.0       | 2 | 1.00 | $ \pm 6\rangle$                                                 |
| 384.3     | 2 | 1.00 | $ \pm 5\rangle$                                                 |
| 729.6     | 1 | 0.99 | $ \pm 4\rangle$                                                 |
| 729.7     | 1 | 0.99 | $ \pm 4\rangle$                                                 |
| 1020.5    | 1 | 0.97 | $ \pm 3\rangle$                                                 |
| 1022.4    | 1 | 0.98 | $ \pm 3\rangle$                                                 |
| 1228.0    | 1 | 0.88 | $ \pm 2\rangle + 0.11  0\rangle$                                |
| 1254.7    | 1 | 0.99 | $ \pm 2\rangle$                                                 |
| 1345.4    | 1 | 0.97 | $ \pm 1\rangle$                                                 |
| 1454.1    | 1 | 0.98 | $ \pm 1\rangle$                                                 |
| 1468.4    | 1 | 0.89 | $ 0\rangle + 0.11  \pm 2\rangle$                                |
| <b>Dy</b> |   |      |                                                                 |
| 0.0       | 2 | 1.00 | $ \pm 15/2\rangle$                                              |
| 382.3     | 2 | 0.99 | $ \pm 13/2\rangle$                                              |
| 698.8     | 2 | 0.98 | $ \pm 11/2\rangle$                                              |
| 943.9     | 2 | 0.97 | $ \pm 9/2\rangle$                                               |
| 1120.9    | 2 | 0.93 | $ \pm 7/2\rangle + 0.05  \pm 3/2\rangle$                        |
| 1235.7    | 2 | 0.79 | $ \pm 5/2\rangle + 0.15  \pm 1/2\rangle$                        |
| 1309.5    | 2 | 0.64 | $ \pm 3/2\rangle + 0.19  \pm 1/2\rangle + 0.13  \pm 5/2\rangle$ |
| 1400.8    | 2 | 0.66 | $ \pm 1/2\rangle + 0.27  \pm 3/2\rangle + 0.06  \pm 5/2\rangle$ |

**Ho**

|       |   |                                              |
|-------|---|----------------------------------------------|
| 0.0   | 2 | $1.00   \pm 8 \rangle$                       |
| 193.3 | 2 | $0.99   \pm 7 \rangle$                       |
| 306.9 | 2 | $0.99   \pm 6 \rangle$                       |
| 381.9 | 2 | $0.97   \pm 5 \rangle$                       |
| 438.6 | 1 | $0.95   \pm 4 \rangle$                       |
| 438.9 | 1 | $0.95   \pm 4 \rangle$                       |
| 483.1 | 1 | $0.87   \pm 3 \rangle + 0.1   \pm 1 \rangle$ |
| 486.2 | 1 | $0.93   \pm 3 \rangle$                       |
| 512.8 | 1 | $0.73   \pm 2 \rangle + 0.23   0 \rangle$    |
| 528.3 | 1 | $0.96   \pm 2 \rangle$                       |
| 536.9 | 1 | $0.89   \pm 1 \rangle + 0.1   \pm 3 \rangle$ |
| 572.5 | 1 | $0.96   \pm 1 \rangle$                       |
| 573.3 | 1 | $0.76   0 \rangle + 0.23   \pm 2 \rangle$    |

**Er**

|       |   |                                                                            |
|-------|---|----------------------------------------------------------------------------|
| 0.0   | 2 | $0.72   \pm 1/2 \rangle + 0.23   \pm 3/2 \rangle + 0.05   \pm 5/2 \rangle$ |
| 37.0  | 2 | $0.72   \pm 3/2 \rangle + 0.19   \pm 1/2 \rangle + 0.06   \pm 5/2 \rangle$ |
| 69.6  | 2 | $0.87   \pm 5/2 \rangle + 0.09   \pm 1/2 \rangle$                          |
| 115.4 | 2 | $0.95   \pm 7/2 \rangle$                                                   |
| 173.8 | 2 | $0.97   \pm 9/2 \rangle$                                                   |
| 249.9 | 2 | $0.99   \pm 11/2 \rangle$                                                  |
| 362.9 | 2 | $0.99   \pm 13/2 \rangle$                                                  |
| 554.1 | 2 | $1.00   \pm 15/2 \rangle$                                                  |

**Tm**

|        |   |                                           |
|--------|---|-------------------------------------------|
| 0.0    | 1 | $0.82   0 \rangle + 0.18   \pm 2 \rangle$ |
| 3.5    | 1 | $0.97   \pm 1 \rangle$                    |
| 86.1   | 1 | $0.95   \pm 1 \rangle$                    |
| 127.5  | 1 | $0.98   \pm 2 \rangle$                    |
| 155.0  | 1 | $0.81   \pm 2 \rangle + 0.17   0 \rangle$ |
| 284.5  | 1 | $0.97   \pm 3 \rangle$                    |
| 287.0  | 1 | $0.95   \pm 3 \rangle$                    |
| 522.0  | 1 | $0.99   \pm 4 \rangle$                    |
| 522.0  | 1 | $0.99   \pm 4 \rangle$                    |
| 862.3  | 2 | $1.00   \pm 5 \rangle$                    |
| 1298.4 | 2 | $1.00   \pm 6 \rangle$                    |

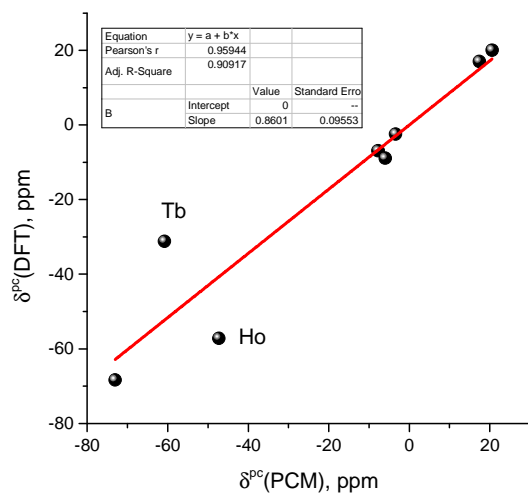

**Figure S11.** Correlation between computed and experimental chemical pseudocontact shifts for  $^{13}\text{C}$ -TbJ. Experimental  $\delta^{\text{pc}}(^{13}\text{C})$  shifts are obtained by subtracting  $\delta^{\text{con}}$  values obtained by DFT calculations from experimental paramagnetic shifts.

### DFT-optimized Cartesian Coordinates (Å) of $MSc_2N@C_{80}$ molecules

#### LaSc<sub>2</sub>N@C<sub>80</sub>

|   |              |              |              |
|---|--------------|--------------|--------------|
| C | -3.025783000 | -1.268402000 | 2.508112000  |
| C | 2.564336000  | -1.998260000 | 2.515854000  |
| C | 0.418363000  | 3.227554000  | 2.502149000  |
| C | -3.348695000 | -2.108412000 | 1.381688000  |
| C | 3.386887000  | -1.835524000 | 1.363734000  |
| C | -0.140404000 | 3.962470000  | 1.399985000  |
| C | -2.523595000 | -3.289905000 | 1.131595000  |
| C | 3.967395000  | -0.531285000 | 1.089112000  |
| C | -1.584871000 | 3.832537000  | 1.150139000  |
| C | -3.904487000 | -1.430196000 | 0.238184000  |
| C | 3.111416000  | -2.672512000 | 0.244657000  |
| C | 0.730600000  | 4.084451000  | 0.247437000  |
| C | -3.250017000 | 0.162952000  | 2.507287000  |
| C | 1.444416000  | -2.913882000 | 2.507943000  |
| C | 1.776460000  | 2.712817000  | 2.504337000  |
| C | -0.273317000 | -3.985408000 | 1.100041000  |
| C | 3.549724000  | 1.763628000  | 1.081107000  |
| C | -3.250161000 | 2.155719000  | 1.083693000  |
| C | -3.735083000 | 0.819984000  | 1.349423000  |
| C | 1.123476000  | -3.691066000 | 1.360667000  |
| C | 2.607715000  | 2.833980000  | 1.358103000  |
| C | -4.094562000 | 0.007233000  | 0.233444000  |
| C | 2.005161000  | -3.590412000 | 0.240665000  |
| C | 2.080355000  | 3.545822000  | 0.242062000  |
| C | -3.584229000 | -1.841083000 | -1.121888000 |
| C | 3.303024000  | -2.170757000 | -1.100976000 |
| C | 0.221236000  | 3.980112000  | -1.112378000 |
| C | -2.710759000 | -2.963400000 | -1.395772000 |
| C | 3.878258000  | -0.878932000 | -1.387634000 |
| C | -1.182569000 | 3.759131000  | -1.387113000 |
| C | -1.815535000 | -2.764116000 | -2.514358000 |
| C | 3.278409000  | -0.202141000 | -2.515011000 |
| C | -1.464445000 | 2.902062000  | -2.506082000 |
| C | -3.576367000 | -0.635011000 | -1.936865000 |
| C | 2.289762000  | -2.797184000 | -1.926172000 |
| C | 1.260049000  | 3.383807000  | -1.926707000 |
| C | 0.350495000  | -2.380238000 | -3.343781000 |
| C | 1.862968000  | 1.482343000  | -3.336899000 |
| C | -2.230868000 | 0.852930000  | -3.357042000 |
| C | -2.688733000 | -0.469714000 | -3.044394000 |
| C | 1.721363000  | -2.110746000 | -3.034864000 |
| C | 0.950073000  | 2.541261000  | -3.037776000 |
| C | -1.829330000 | -1.569849000 | -3.340624000 |
| C | 2.248077000  | -0.813414000 | -3.330559000 |

|    |              |              |              |
|----|--------------|--------------|--------------|
| C  | -0.428299000 | 2.336665000  | -3.338084000 |
| C  | -0.797964000 | -4.137414000 | -0.241811000 |
| C  | 4.019996000  | 1.409743000  | -0.251344000 |
| C  | -3.104065000 | 2.673063000  | -0.246874000 |
| C  | 0.098739000  | -3.893309000 | -1.363190000 |
| C  | 3.332293000  | 2.047572000  | -1.370517000 |
| C  | -3.380713000 | 1.799485000  | -1.369190000 |
| C  | -3.906518000 | 0.490448000  | -1.104825000 |
| C  | 1.495154000  | -3.672158000 | -1.102912000 |
| C  | 2.410574000  | 3.130540000  | -1.097037000 |
| C  | -0.447433000 | -3.249990000 | -2.513516000 |
| C  | 3.021945000  | 1.231693000  | -2.508790000 |
| C  | -2.576828000 | 1.969712000  | -2.523716000 |
| C  | -0.502632000 | -1.340937000 | -3.845615000 |
| C  | 1.391638000  | 0.222525000  | -3.836453000 |
| C  | -0.898501000 | 1.076460000  | -3.850599000 |
| C  | -0.003537000 | -0.014858000 | -4.064917000 |
| C  | -2.208563000 | -3.734065000 | -0.245808000 |
| C  | 4.312941000  | -0.049679000 | -0.251451000 |
| C  | -2.100229000 | 3.729302000  | -0.244124000 |
| C  | 0.408797000  | -2.361581000 | 3.340849000  |
| C  | 1.806918000  | 1.538527000  | 3.335766000  |
| C  | -2.254620000 | 0.789578000  | 3.340135000  |
| C  | -0.972487000 | -2.576272000 | 3.042748000  |
| C  | 2.661187000  | 0.437565000  | 3.031175000  |
| C  | -1.734440000 | 2.088995000  | 3.043776000  |
| C  | -1.317583000 | -3.453705000 | 1.936493000  |
| C  | 3.542853000  | 0.582806000  | 1.897499000  |
| C  | -2.298431000 | 2.822575000  | 1.928555000  |
| C  | -1.871622000 | -1.510643000 | 3.342460000  |
| C  | 2.208776000  | -0.876350000 | 3.345803000  |
| C  | -0.368207000 | 2.347727000  | 3.346732000  |
| C  | -1.401282000 | -0.248005000 | 3.853551000  |
| C  | 0.883112000  | -1.101490000 | 3.857875000  |
| C  | 0.486463000  | 1.317682000  | 3.860708000  |
| C  | -0.009929000 | -0.010528000 | 4.073957000  |
| N  | 0.230321000  | 0.349965000  | 0.034285000  |
| La | -1.064400000 | -1.478445000 | 0.008174000  |
| Sc | 2.121156000  | 0.210332000  | -0.312816000 |
| Sc | -0.669662000 | 2.051620000  | 0.185912000  |

**CeSc<sub>2</sub>N@C<sub>80</sub>**

|   |              |              |              |
|---|--------------|--------------|--------------|
| C | -3.024279000 | -1.266441000 | 2.508912000  |
| C | 2.565467000  | -1.998261000 | 2.517415000  |
| C | 0.418642000  | 3.226577000  | 2.502952000  |
| C | -3.345310000 | -2.104726000 | 1.381401000  |
| C | 3.387448000  | -1.835853000 | 1.364653000  |
| C | -0.140115000 | 3.958714000  | 1.399294000  |
| C | -2.520678000 | -3.285626000 | 1.131141000  |
| C | 3.967102000  | -0.531657000 | 1.090088000  |
| C | -1.583560000 | 3.829387000  | 1.149399000  |
| C | -3.901247000 | -1.427260000 | 0.238152000  |
| C | 3.112550000  | -2.672595000 | 0.244939000  |
| C | 0.730052000  | 4.081241000  | 0.247241000  |
| C | -3.249813000 | 0.164257000  | 2.508341000  |
| C | 1.445812000  | -2.913617000 | 2.509428000  |
| C | 1.776620000  | 2.712546000  | 2.505511000  |
| C | -0.271081000 | -3.979749000 | 1.099238000  |
| C | 3.547730000  | 1.762518000  | 1.081595000  |
| C | -3.250649000 | 2.155969000  | 1.084119000  |
| C | -3.735686000 | 0.820843000  | 1.350273000  |
| C | 1.125637000  | -3.689505000 | 1.361167000  |
| C | 2.606893000  | 2.833069000  | 1.358576000  |
| C | -4.094462000 | 0.009136000  | 0.233373000  |
| C | 2.006924000  | -3.590593000 | 0.240846000  |
| C | 2.079639000  | 3.544142000  | 0.242080000  |
| C | -3.581169000 | -1.838126000 | -1.121615000 |
| C | 3.303277000  | -2.170700000 | -1.101000000 |
| C | 0.220944000  | 3.977810000  | -1.112305000 |
| C | -2.708312000 | -2.960235000 | -1.395629000 |
| C | 3.876533000  | -0.878453000 | -1.387288000 |
| C | -1.182233000 | 3.757284000  | -1.387045000 |
| C | -1.813486000 | -2.761029000 | -2.513784000 |
| C | 3.276742000  | -0.202113000 | -2.514672000 |
| C | -1.464585000 | 2.902110000  | -2.507089000 |
| C | -3.575871000 | -0.633087000 | -1.937492000 |
| C | 2.290667000  | -2.796971000 | -1.926710000 |
| C | 1.259760000  | 3.383214000  | -1.927257000 |
| C | 0.351412000  | -2.379510000 | -3.345523000 |
| C | 1.862611000  | 1.482381000  | -3.338221000 |
| C | -2.231091000 | 0.853923000  | -3.358574000 |
| C | -2.688525000 | -0.468396000 | -3.045419000 |
| C | 1.722218000  | -2.110726000 | -3.036020000 |
| C | 0.949834000  | 2.541276000  | -3.038776000 |
| C | -1.828479000 | -1.568165000 | -3.341487000 |
| C | 2.248043000  | -0.813378000 | -3.331859000 |
| C | -0.428489000 | 2.337087000  | -3.339411000 |
| C | -0.795822000 | -4.132293000 | -0.241981000 |
| C | 4.015419000  | 1.407846000  | -0.250859000 |

|    |              |              |              |
|----|--------------|--------------|--------------|
| C  | -3.104355000 | 2.672792000  | -0.246863000 |
| C  | 0.100614000  | -3.890198000 | -1.363329000 |
| C  | 3.329051000  | 2.045718000  | -1.369830000 |
| C  | -3.381242000 | 1.800399000  | -1.369921000 |
| C  | -3.907397000 | 0.491925000  | -1.105466000 |
| C  | 1.496856000  | -3.671841000 | -1.103026000 |
| C  | 2.409610000  | 3.129676000  | -1.097150000 |
| C  | -0.445713000 | -3.247446000 | -2.513655000 |
| C  | 3.019936000  | 1.231078000  | -2.508601000 |
| C  | -2.577093000 | 1.970340000  | -2.524618000 |
| C  | -0.502158000 | -1.340210000 | -3.847556000 |
| C  | 1.391748000  | 0.222676000  | -3.838386000 |
| C  | -0.898638000 | 1.077119000  | -3.852281000 |
| C  | -0.003429000 | -0.014195000 | -4.067066000 |
| C  | -2.206313000 | -3.730612000 | -0.245900000 |
| C  | 4.310035000  | -0.049911000 | -0.250988000 |
| C  | -2.099081000 | 3.727134000  | -0.244062000 |
| C  | 0.410112000  | -2.361069000 | 3.342486000  |
| C  | 1.807517000  | 1.538687000  | 3.337622000  |
| C  | -2.254603000 | 0.790480000  | 3.341840000  |
| C  | -0.970914000 | -2.573808000 | 3.043733000  |
| C  | 2.661701000  | 0.437627000  | 3.032878000  |
| C  | -1.734232000 | 2.089254000  | 3.044855000  |
| C  | -1.314936000 | -3.448093000 | 1.935303000  |
| C  | 3.542473000  | 0.582321000  | 1.898574000  |
| C  | -2.298107000 | 2.821672000  | 1.928792000  |
| C  | -1.870669000 | -1.509088000 | 3.343973000  |
| C  | 2.209781000  | -0.876268000 | 3.347660000  |
| C  | -0.367907000 | 2.347691000  | 3.347977000  |
| C  | -1.400961000 | -0.247009000 | 3.855673000  |
| C  | 0.884105000  | -1.101153000 | 3.859796000  |
| C  | 0.486993000  | 1.317947000  | 3.862496000  |
| C  | -0.009313000 | -0.010178000 | 4.075942000  |
| N  | 0.217107000  | 0.332588000  | 0.025566000  |
| Ce | -1.073861000 | -1.488673000 | 0.004319000  |
| Sc | 2.115194000  | 0.201747000  | -0.307781000 |
| Sc | -0.673818000 | 2.042712000  | 0.184256000  |

**PrSc<sub>2</sub>N@C<sub>80</sub>**

|   |              |              |              |
|---|--------------|--------------|--------------|
| C | -3.022834000 | -1.264737000 | 2.509539000  |
| C | 2.566511000  | -1.998081000 | 2.518816000  |
| C | 0.418989000  | 3.225745000  | 2.503771000  |
| C | -3.342670000 | -2.101706000 | 1.381293000  |
| C | 3.388100000  | -1.835890000 | 1.365522000  |
| C | -0.139717000 | 3.955031000  | 1.398561000  |
| C | -2.518134000 | -3.281867000 | 1.130846000  |
| C | 3.967570000  | -0.531960000 | 1.091239000  |
| C | -1.582080000 | 3.825967000  | 1.148525000  |
| C | -3.898872000 | -1.424855000 | 0.238167000  |
| C | 3.113423000  | -2.672243000 | 0.245131000  |
| C | 0.729634000  | 4.078554000  | 0.247013000  |
| C | -3.249535000 | 0.165354000  | 2.509282000  |
| C | 1.447141000  | -2.913175000 | 2.510669000  |
| C | 1.776745000  | 2.712300000  | 2.506477000  |
| C | -0.268914000 | -3.974235000 | 1.098489000  |
| C | 3.545534000  | 1.761413000  | 1.082088000  |
| C | -3.250769000 | 2.155863000  | 1.084346000  |
| C | -3.736120000 | 0.821454000  | 1.351007000  |
| C | 1.127616000  | -3.687744000 | 1.361492000  |
| C | 2.606122000  | 2.832394000  | 1.358941000  |
| C | -4.094446000 | 0.010678000  | 0.233360000  |
| C | 2.008510000  | -3.590472000 | 0.240872000  |
| C | 2.079149000  | 3.542963000  | 0.242015000  |
| C | -3.578818000 | -1.835604000 | -1.121464000 |
| C | 3.303577000  | -2.170395000 | -1.101132000 |
| C | 0.220678000  | 3.976121000  | -1.112344000 |
| C | -2.706084000 | -2.957291000 | -1.395502000 |
| C | 3.875312000  | -0.877887000 | -1.387152000 |
| C | -1.181984000 | 3.755989000  | -1.387103000 |
| C | -1.811400000 | -2.757987000 | -2.513072000 |
| C | 3.274983000  | -0.201985000 | -2.514202000 |
| C | -1.464693000 | 2.902179000  | -2.507881000 |
| C | -3.575314000 | -0.631400000 | -1.937930000 |
| C | 2.291614000  | -2.796659000 | -1.927348000 |
| C | 1.259534000  | 3.382978000  | -1.927843000 |
| C | 0.352313000  | -2.378812000 | -3.347283000 |
| C | 1.862256000  | 1.482547000  | -3.339534000 |
| C | -2.231219000 | 0.854811000  | -3.359894000 |
| C | -2.688240000 | -0.467206000 | -3.046256000 |
| C | 1.723036000  | -2.110620000 | -3.037231000 |
| C | 0.949670000  | 2.541469000  | -3.039749000 |
| C | -1.827533000 | -1.566504000 | -3.342159000 |
| C | 2.248013000  | -0.813260000 | -3.333143000 |
| C | -0.428637000 | 2.337546000  | -3.340556000 |
| C | -0.793646000 | -4.126837000 | -0.242182000 |
| C | 4.010140000  | 1.405759000  | -0.250341000 |



|    |              |              |              |
|----|--------------|--------------|--------------|
| C  | -3.104429000 | 2.672378000  | -0.246926000 |
| C  | 0.102476000  | -3.887056000 | -1.363575000 |
| C  | 3.325149000  | 2.043740000  | -1.368936000 |
| C  | -3.381654000 | 1.801057000  | -1.370555000 |
| C  | -3.908222000 | 0.493140000  | -1.105971000 |
| C  | 1.498548000  | -3.671396000 | -1.103263000 |
| C  | 2.408730000  | 3.129352000  | -1.097325000 |
| C  | -0.444015000 | -3.245130000 | -2.514003000 |
| C  | 3.017659000  | 1.230516000  | -2.508269000 |
| C  | -2.577266000 | 1.970816000  | -2.525356000 |
| C  | -0.501660000 | -1.339468000 | -3.849421000 |
| C  | 1.391916000  | 0.222914000  | -3.840353000 |
| C  | -0.898726000 | 1.077782000  | -3.853787000 |
| C  | -0.003275000 | -0.013520000 | -4.069047000 |
| C  | -2.204064000 | -3.727153000 | -0.245991000 |
| C  | 4.307633000  | -0.050030000 | -0.250593000 |
| C  | -2.097985000 | 3.725126000  | -0.244078000 |
| C  | 0.411324000  | -2.360476000 | 3.343840000  |
| C  | 1.808130000  | 1.538853000  | 3.339280000  |
| C  | -2.254519000 | 0.791201000  | 3.343377000  |
| C  | -0.969480000 | -2.571489000 | 3.044610000  |
| C  | 2.662312000  | 0.437732000  | 3.034564000  |
| C  | -1.733832000 | 2.089312000  | 3.045788000  |
| C  | -1.312534000 | -3.442970000 | 1.934330000  |
| C  | 3.542372000  | 0.581886000  | 1.899729000  |
| C  | -2.297386000 | 2.820342000  | 1.928751000  |
| C  | -1.869888000 | -1.507762000 | 3.345522000  |
| C  | 2.210780000  | -0.876140000 | 3.349508000  |
| C  | -0.367554000 | 2.347767000  | 3.349300000  |
| C  | -1.400665000 | -0.246139000 | 3.857655000  |
| C  | 0.885022000  | -1.100766000 | 3.861484000  |
| C  | 0.487550000  | 1.318256000  | 3.864215000  |
| C  | -0.008725000 | -0.009791000 | 4.077713000  |
| N  | 0.205027000  | 0.315999000  | 0.017840000  |
| Pr | -1.084997000 | -1.496195000 | 0.001888000  |
| Sc | 2.109846000  | 0.189013000  | -0.301244000 |
| Sc | -0.676982000 | 2.034693000  | 0.180526000  |

**NdSc<sub>2</sub>N@C<sub>80</sub>**

|   |              |              |              |
|---|--------------|--------------|--------------|
| C | -3.021490000 | -1.262907000 | 2.510424000  |
| C | 2.567416000  | -1.998015000 | 2.520182000  |
| C | 0.419208000  | 3.224896000  | 2.504521000  |
| C | -3.339280000 | -2.098103000 | 1.380955000  |
| C | 3.388495000  | -1.836096000 | 1.366336000  |
| C | -0.139458000 | 3.951611000  | 1.397908000  |
| C | -2.515296000 | -3.277725000 | 1.130308000  |
| C | 3.967286000  | -0.532255000 | 1.092061000  |
| C | -1.580956000 | 3.823149000  | 1.147885000  |
| C | -3.895798000 | -1.422003000 | 0.238103000  |
| C | 3.114258000  | -2.672111000 | 0.245317000  |
| C | 0.729173000  | 4.075617000  | 0.246819000  |
| C | -3.249355000 | 0.166554000  | 2.510296000  |
| C | 1.448255000  | -2.912870000 | 2.511975000  |
| C | 1.776814000  | 2.712071000  | 2.507450000  |
| C | -0.266947000 | -3.969254000 | 1.097747000  |
| C | 3.543607000  | 1.760417000  | 1.082438000  |
| C | -3.251269000 | 2.156118000  | 1.084797000  |
| C | -3.736705000 | 0.822235000  | 1.351819000  |
| C | 1.129430000  | -3.686266000 | 1.361906000  |
| C | 2.605340000  | 2.831643000  | 1.359313000  |
| C | -4.094420000 | 0.012464000  | 0.233305000  |
| C | 2.009902000  | -3.590432000 | 0.240980000  |
| C | 2.078625000  | 3.541609000  | 0.241977000  |
| C | -3.575978000 | -1.832844000 | -1.121261000 |
| C | 3.303771000  | -2.170259000 | -1.101243000 |
| C | 0.220442000  | 3.973962000  | -1.112288000 |
| C | -2.703919000 | -2.954446000 | -1.395424000 |
| C | 3.873927000  | -0.877457000 | -1.387027000 |
| C | -1.181656000 | 3.754192000  | -1.386960000 |
| C | -1.809660000 | -2.755379000 | -2.512770000 |
| C | 3.273573000  | -0.201942000 | -2.514034000 |
| C | -1.464749000 | 2.902078000  | -2.508668000 |
| C | -3.574889000 | -0.629642000 | -1.938544000 |
| C | 2.292368000  | -2.796432000 | -1.927895000 |
| C | 1.259355000  | 3.382541000  | -1.928410000 |
| C | 0.353095000  | -2.378299000 | -3.348976000 |
| C | 1.862004000  | 1.482601000  | -3.340831000 |
| C | -2.231374000 | 0.855634000  | -3.361201000 |
| C | -2.688088000 | -0.466086000 | -3.047224000 |
| C | 1.723736000  | -2.110586000 | -3.038307000 |
| C | 0.949528000  | 2.541511000  | -3.040692000 |
| C | -1.826813000 | -1.565079000 | -3.343008000 |
| C | 2.248015000  | -0.813237000 | -3.334393000 |
| C | -0.428745000 | 2.337859000  | -3.341692000 |
| C | -0.791764000 | -4.122511000 | -0.242419000 |
| C | 4.005874000  | 1.404020000  | -0.249981000 |

|    |              |              |              |
|----|--------------|--------------|--------------|
| C  | -3.104776000 | 2.672194000  | -0.246870000 |
| C  | 0.104071000  | -3.884541000 | -1.363860000 |
| C  | 3.322233000  | 2.042175000  | -1.368430000 |
| C  | -3.382158000 | 1.801876000  | -1.371177000 |
| C  | -3.909075000 | 0.494506000  | -1.106557000 |
| C  | 1.499959000  | -3.671059000 | -1.103425000 |
| C  | 2.408029000  | 3.128831000  | -1.097543000 |
| C  | -0.442551000 | -3.243167000 | -2.514423000 |
| C  | 3.015916000  | 1.230023000  | -2.508245000 |
| C  | -2.577442000 | 1.971297000  | -2.526083000 |
| C  | -0.501243000 | -1.338900000 | -3.851196000 |
| C  | 1.392050000  | 0.223038000  | -3.842163000 |
| C  | -0.898814000 | 1.078305000  | -3.855236000 |
| C  | -0.003163000 | -0.012996000 | -4.070933000 |
| C  | -2.202001000 | -3.723943000 | -0.246131000 |
| C  | 4.305071000  | -0.050218000 | -0.250272000 |
| C  | -2.097026000 | 3.723194000  | -0.243999000 |
| C  | 0.412394000  | -2.359980000 | 3.345338000  |
| C  | 1.808554000  | 1.538983000  | 3.340856000  |
| C  | -2.254561000 | 0.792061000  | 3.345019000  |
| C  | -0.968211000 | -2.569325000 | 3.045676000  |
| C  | 2.662661000  | 0.437800000  | 3.036009000  |
| C  | -1.733713000 | 2.089597000  | 3.046834000  |
| C  | -1.310172000 | -3.437894000 | 1.933321000  |
| C  | 3.541959000  | 0.581479000  | 1.900627000  |
| C  | -2.297167000 | 2.819575000  | 1.929019000  |
| C  | -1.869215000 | -1.506434000 | 3.347191000  |
| C  | 2.211592000  | -0.876040000 | 3.351156000  |
| C  | -0.367356000 | 2.347774000  | 3.350445000  |
| C  | -1.400481000 | -0.245239000 | 3.859751000  |
| C  | 0.885853000  | -1.100449000 | 3.863274000  |
| C  | 0.487932000  | 1.318492000  | 3.865780000  |
| C  | -0.008257000 | -0.009467000 | 4.079557000  |
| N  | 0.193766000  | 0.300516000  | 0.012144000  |
| Nd | -1.091681000 | -1.505274000 | -0.002157000 |
| Sc | 2.104722000  | 0.180307000  | -0.296736000 |
| Sc | -0.681462000 | 2.026454000  | 0.179244000  |

**TbSc<sub>2</sub>N@C<sub>80</sub>**

symmetry c1

|   |              |              |              |
|---|--------------|--------------|--------------|
| C | -3.016457000 | -1.256116000 | 2.514370000  |
| C | 2.570769000  | -1.997385000 | 2.525509000  |
| C | 0.420220000  | 3.220982000  | 2.508278000  |
| C | -3.324994000 | -2.083025000 | 1.379225000  |
| C | 3.390562000  | -1.836169000 | 1.369828000  |
| C | -0.138174000 | 3.933624000  | 1.394013000  |
| C | -2.503086000 | -3.260207000 | 1.127954000  |
| C | 3.969419000  | -0.533563000 | 1.096821000  |
| C | -1.575347000 | 3.807662000  | 1.143646000  |
| C | -3.883289000 | -1.410114000 | 0.237806000  |
| C | 3.116616000  | -2.670024000 | 0.245738000  |
| C | 0.727082000  | 4.062374000  | 0.245471000  |
| C | -3.248685000 | 0.170777000  | 2.514096000  |
| C | 1.452524000  | -2.911413000 | 2.516738000  |
| C | 1.776656000  | 2.710756000  | 2.511177000  |
| C | -0.259000000 | -3.950348000 | 1.095022000  |
| C | 3.533721000  | 1.755644000  | 1.084089000  |
| C | -3.253226000 | 2.155803000  | 1.085784000  |
| C | -3.739642000 | 0.824597000  | 1.354801000  |
| C | 1.136600000  | -3.680630000 | 1.363433000  |
| C | 2.601531000  | 2.828767000  | 1.360536000  |
| C | -4.096006000 | 0.019378000  | 0.232957000  |
| C | 2.014971000  | -3.589664000 | 0.241010000  |
| C | 2.076677000  | 3.536682000  | 0.241302000  |
| C | -3.563829000 | -1.820636000 | -1.120182000 |
| C | 3.304212000  | -2.169076000 | -1.102137000 |
| C | 0.218750000  | 3.965362000  | -1.112427000 |
| C | -2.693826000 | -2.940873000 | -1.394329000 |
| C | 3.868151000  | -0.874942000 | -1.386886000 |
| C | -1.181361000 | 3.748543000  | -1.387184000 |
| C | -1.802264000 | -2.743889000 | -2.511197000 |
| C | 3.265905000  | -0.201222000 | -2.512449000 |
| C | -1.465369000 | 2.901395000  | -2.511470000 |
| C | -3.573932000 | -0.622325000 | -1.941107000 |
| C | 2.295169000  | -2.795224000 | -1.930443000 |
| C | 1.258280000  | 3.381471000  | -1.931295000 |
| C | 0.355864000  | -2.375482000 | -3.355591000 |
| C | 1.860653000  | 1.483512000  | -3.347106000 |
| C | -2.232555000 | 0.858988000  | -3.366827000 |
| C | -2.688196000 | -0.461514000 | -3.051161000 |
| C | 1.726146000  | -2.109865000 | -3.042936000 |
| C | 0.948642000  | 2.542236000  | -3.045000000 |
| C | -1.824176000 | -1.558881000 | -3.346275000 |
| C | 2.247343000  | -0.812697000 | -3.339854000 |
| C | -0.429657000 | 2.339202000  | -3.346342000 |
| C | -0.783939000 | -4.105721000 | -0.243364000 |

|    |              |              |              |
|----|--------------|--------------|--------------|
| C  | 3.983360000  | 1.395307000  | -0.248298000 |
| C  | -3.107474000 | 2.671413000  | -0.247223000 |
| C  | 0.110118000  | -3.874255000 | -1.364959000 |
| C  | 3.306407000  | 2.034802000  | -1.365803000 |
| C  | -3.385511000 | 1.804676000  | -1.373939000 |
| C  | -3.914701000 | 0.499981000  | -1.109312000 |
| C  | 1.505555000  | -3.669459000 | -1.104422000 |
| C  | 2.404813000  | 3.128090000  | -1.099024000 |
| C  | -0.436907000 | -3.234626000 | -2.515807000 |
| C  | 3.006777000  | 1.228263000  | -2.508061000 |
| C  | -2.578708000 | 1.972700000  | -2.529052000 |
| C  | -0.499913000 | -1.335996000 | -3.858311000 |
| C  | 1.392223000  | 0.223928000  | -3.850319000 |
| C  | -0.899736000 | 1.080795000  | -3.861590000 |
| C  | -0.003066000 | -0.010461000 | -4.079065000 |
| C  | -2.192752000 | -3.709385000 | -0.246508000 |
| C  | 4.294605000  | -0.050715000 | -0.248996000 |
| C  | -2.094271000 | 3.715637000  | -0.244421000 |
| C  | 0.416510000  | -2.357922000 | 3.350859000  |
| C  | 1.810449000  | 1.539154000  | 3.347326000  |
| C  | -2.254331000 | 0.794696000  | 3.351004000  |
| C  | -0.963502000 | -2.561132000 | 3.049866000  |
| C  | 2.664516000  | 0.437944000  | 3.042756000  |
| C  | -1.732546000 | 2.089698000  | 3.050833000  |
| C  | -1.300706000 | -3.418397000 | 1.929789000  |
| C  | 3.541089000  | 0.579569000  | 1.905120000  |
| C  | -2.295023000 | 2.813586000  | 1.928730000  |
| C  | -1.867107000 | -1.501978000 | 3.354496000  |
| C  | 2.214972000  | -0.875852000 | 3.358608000  |
| C  | -0.366417000 | 2.347921000  | 3.356114000  |
| C  | -1.399786000 | -0.242267000 | 3.868043000  |
| C  | 0.889086000  | -1.099370000 | 3.870373000  |
| C  | 0.489567000  | 1.319250000  | 3.872704000  |
| C  | -0.006460000 | -0.008275000 | 4.086914000  |
| N  | 0.145787000  | 0.230586000  | -0.004426000 |
| Tb | -1.113423000 | -1.547259000 | -0.015510000 |
| Sc | 2.083796000  | 0.124087000  | -0.265247000 |
| Sc | -0.706735000 | 1.988516000  | 0.159846000  |

**DySc<sub>2</sub>N@C<sub>80</sub>**

|   |              |              |              |
|---|--------------|--------------|--------------|
| C | 0.827070000  | 2.554839000  | 3.109441000  |
| C | 0.442936000  | 1.423108000  | 3.904970000  |
| C | -0.982670000 | 1.107303000  | 4.012761000  |
| C | 1.368465000  | 0.314968000  | 3.889197000  |
| C | 2.081614000  | 2.615836000  | 2.386235000  |
| C | 3.723238000  | 1.261702000  | 1.158590000  |
| C | 2.965321000  | 1.504119000  | 2.368486000  |
| C | 2.613135000  | 0.367758000  | 3.151345000  |
| C | 0.913632000  | -1.064759000 | 3.874843000  |
| C | -0.488189000 | -1.402872000 | 3.885608000  |
| C | -1.444527000 | -0.303048000 | 4.001804000  |
| C | -0.855631000 | -2.547187000 | 3.100417000  |
| C | 1.880902000  | -1.841135000 | 3.131574000  |
| C | 2.231284000  | -3.242492000 | 1.161591000  |
| C | 1.489811000  | -2.973592000 | 2.353902000  |
| C | 0.112107000  | -3.338584000 | 2.377823000  |
| C | 4.167385000  | -0.051926000 | 0.730006000  |
| C | 3.656009000  | -1.194434000 | 1.471197000  |
| C | 2.931407000  | -0.959606000 | 2.694959000  |
| C | 3.282258000  | -2.355278000 | 0.724053000  |
| C | -2.103066000 | -2.621012000 | 2.365464000  |
| C | -2.978345000 | -1.504679000 | 2.330646000  |
| C | -2.612939000 | -0.359042000 | 3.138269000  |
| C | -3.723854000 | -1.273159000 | 1.129709000  |
| C | -1.903796000 | -3.450448000 | 1.209936000  |
| C | -1.893028000 | -3.428037000 | -1.241478000 |
| C | -2.580376000 | -3.163983000 | -0.018677000 |
| C | -3.529973000 | -2.096221000 | -0.033629000 |
| C | 1.588359000  | -3.775587000 | -0.005304000 |
| C | 0.185716000  | -4.069253000 | -0.009831000 |
| C | -0.531733000 | -3.883340000 | 1.212216000  |
| C | -0.529058000 | -3.879395000 | -1.237298000 |
| C | -4.041860000 | 0.056686000  | 0.685211000  |
| C | -3.609646000 | 1.199705000  | 1.421168000  |
| C | -2.901531000 | 0.962435000  | 2.654779000  |
| C | -3.282090000 | 2.374561000  | 0.696447000  |
| C | -4.061487000 | 0.060736000  | -0.759754000 |
| C | -3.037492000 | 0.997709000  | -2.806869000 |
| C | -3.668858000 | 1.220479000  | -1.513054000 |
| C | -3.284276000 | 2.375188000  | -0.748457000 |
| C | -2.100759000 | -2.600047000 | -2.413308000 |
| C | -3.063593000 | -1.527633000 | -2.464355000 |
| C | -3.751513000 | -1.284252000 | -1.217420000 |
| C | -2.744148000 | -0.363954000 | -3.302885000 |
| C | -2.239400000 | 3.259844000  | 1.150842000  |
| C | -1.502619000 | 2.993255000  | 2.344128000  |
| C | -1.889355000 | 1.852633000  | 3.149416000  |

|    |              |              |              |
|----|--------------|--------------|--------------|
| C  | -0.127601000 | 3.361611000  | 2.376671000  |
| C  | -1.589138000 | 3.808440000  | -0.010698000 |
| C  | 0.528447000  | 3.906303000  | -1.228406000 |
| C  | -0.188018000 | 4.091873000  | -0.006627000 |
| C  | 0.526114000  | 3.908941000  | 1.223076000  |
| C  | -1.914724000 | 1.850646000  | -3.156165000 |
| C  | -1.496049000 | 2.992667000  | -2.368332000 |
| C  | -2.229913000 | 3.264230000  | -1.177445000 |
| C  | -0.117186000 | 3.357069000  | -2.393598000 |
| C  | 1.894339000  | 3.455334000  | -1.222775000 |
| C  | 2.565011000  | 3.171066000  | 0.000320000  |
| C  | 1.887431000  | 3.445015000  | 1.225426000  |
| C  | 3.502330000  | 2.073914000  | -0.002618000 |
| C  | 2.101704000  | 2.631637000  | -2.387789000 |
| C  | 2.635432000  | 0.373823000  | -3.142453000 |
| C  | 2.988108000  | 1.515227000  | -2.363363000 |
| C  | 3.779476000  | 1.276706000  | -1.170508000 |
| C  | -0.937061000 | 1.060314000  | -3.851465000 |
| C  | 1.401560000  | 0.312997000  | -3.872031000 |
| C  | 0.469197000  | 1.394154000  | -3.815849000 |
| C  | 0.852470000  | 2.567687000  | -3.110080000 |
| C  | -0.834728000 | -2.548117000 | -3.120213000 |
| C  | 0.946312000  | -1.054346000 | -3.865477000 |
| C  | -0.450103000 | -1.378544000 | -3.839115000 |
| C  | -1.419654000 | -0.300331000 | -3.921680000 |
| C  | 2.239157000  | -3.233164000 | -1.166478000 |
| C  | 1.902845000  | -1.838231000 | -3.130749000 |
| C  | 1.502641000  | -2.969472000 | -2.362178000 |
| C  | 0.123149000  | -3.345912000 | -2.401742000 |
| C  | 4.239143000  | -0.049024000 | -0.746853000 |
| C  | 2.961305000  | -0.961052000 | -2.676904000 |
| C  | 3.738353000  | -1.211053000 | -1.490961000 |
| C  | 3.305669000  | -2.358052000 | -0.728418000 |
| N  | 0.177118000  | 0.014674000  | 0.192374000  |
| Dy | -1.351784000 | -0.081902000 | -1.348894000 |
| Sc | 2.087332000  | -0.167067000 | -0.213543000 |
| Sc | -0.375334000 | 0.166463000  | 2.070833000  |

**HoSc<sub>2</sub>N@C<sub>80</sub>**

|   |              |              |              |
|---|--------------|--------------|--------------|
| C | -3.014605000 | -1.253402000 | 2.515668000  |
| C | 2.571967000  | -1.996943000 | 2.527251000  |
| C | 0.420976000  | 3.220076000  | 2.509858000  |
| C | -3.319746000 | -2.077337000 | 1.378471000  |
| C | 3.391408000  | -1.835892000 | 1.371017000  |
| C | -0.137263000 | 3.926998000  | 1.392457000  |
| C | -2.498719000 | -3.253836000 | 1.126991000  |
| C | 3.970699000  | -0.533811000 | 1.098669000  |
| C | -1.572776000 | 3.801674000  | 1.141779000  |
| C | -3.878723000 | -1.405401000 | 0.237718000  |
| C | 3.117215000  | -2.668844000 | 0.245786000  |
| C | 0.726714000  | 4.057912000  | 0.244931000  |
| C | -3.248331000 | 0.172596000  | 2.515281000  |
| C | 1.454058000  | -2.910718000 | 2.518174000  |
| C | 1.776949000  | 2.710803000  | 2.512653000  |
| C | -0.256171000 | -3.943885000 | 1.093972000  |
| C | 3.530218000  | 1.754184000  | 1.084674000  |
| C | -3.253911000 | 2.155997000  | 1.086043000  |
| C | -3.740827000 | 0.825782000  | 1.355797000  |
| C | 1.139157000  | -3.678724000 | 1.363851000  |
| C | 2.600446000  | 2.828148000  | 1.361043000  |
| C | -4.096880000 | 0.022149000  | 0.232857000  |
| C | 2.016673000  | -3.589281000 | 0.240863000  |
| C | 2.076363000  | 3.535289000  | 0.241010000  |
| C | -3.558937000 | -1.815631000 | -1.119626000 |
| C | 3.304190000  | -2.168394000 | -1.102542000 |
| C | 0.218415000  | 3.962917000  | -1.112554000 |
| C | -2.689700000 | -2.935343000 | -1.393631000 |
| C | 3.865877000  | -0.873694000 | -1.386852000 |
| C | -1.181115000 | 3.747353000  | -1.387394000 |
| C | -1.799405000 | -2.739493000 | -2.510574000 |
| C | 3.263063000  | -0.200574000 | -2.511803000 |
| C | -1.465259000 | 2.901339000  | -2.512144000 |
| C | -3.573270000 | -0.619296000 | -1.941833000 |
| C | 2.296111000  | -2.794724000 | -1.931416000 |
| C | 1.258183000  | 3.381616000  | -1.932381000 |
| C | 0.356870000  | -2.374305000 | -3.357836000 |
| C | 1.860440000  | 1.484231000  | -3.349429000 |
| C | -2.232725000 | 0.860445000  | -3.368606000 |
| C | -2.688106000 | -0.459620000 | -3.052461000 |
| C | 1.726938000  | -2.109339000 | -3.044506000 |
| C | 0.948587000  | 2.542841000  | -3.046461000 |
| C | -1.823068000 | -1.556353000 | -3.347155000 |
| C | 2.247078000  | -0.812178000 | -3.341685000 |
| C | -0.429717000 | 2.339906000  | -3.347833000 |
| C | -0.781188000 | -4.100190000 | -0.243787000 |
| C | 3.974889000  | 1.392290000  | -0.247751000 |



|    |              |              |              |
|----|--------------|--------------|--------------|
| C  | -3.108575000 | 2.671717000  | -0.247397000 |
| C  | 0.112210000  | -3.870918000 | -1.365469000 |
| C  | 3.300948000  | 2.032660000  | -1.365115000 |
| C  | -3.386783000 | 1.805972000  | -1.374806000 |
| C  | -3.917035000 | 0.502315000  | -1.110302000 |
| C  | 1.507537000  | -3.669003000 | -1.104923000 |
| C  | 2.404051000  | 3.128341000  | -1.099665000 |
| C  | -0.434884000 | -3.231650000 | -2.516392000 |
| C  | 3.003832000  | 1.228159000  | -2.508301000 |
| C  | -2.578888000 | 1.973374000  | -2.529826000 |
| C  | -0.499315000 | -1.334697000 | -3.860665000 |
| C  | 1.392387000  | 0.224556000  | -3.853199000 |
| C  | -0.899889000 | 1.081967000  | -3.863712000 |
| C  | -0.002915000 | -0.009310000 | -4.081792000 |
| C  | -2.189382000 | -3.704003000 | -0.246633000 |
| C  | 4.290715000  | -0.050603000 | -0.248582000 |
| C  | -2.093237000 | 3.713474000  | -0.244711000 |
| C  | 0.418024000  | -2.356892000 | 3.352451000  |
| C  | 1.811385000  | 1.539517000  | 3.349605000  |
| C  | -2.253950000 | 0.795863000  | 3.352831000  |
| C  | -0.961784000 | -2.557943000 | 3.050939000  |
| C  | 2.665327000  | 0.438256000  | 3.045128000  |
| C  | -1.731764000 | 2.089970000  | 3.052141000  |
| C  | -1.297346000 | -3.411579000 | 1.928497000  |
| C  | 3.541030000  | 0.579162000  | 1.906756000  |
| C  | -2.293755000 | 2.811294000  | 1.928301000  |
| C  | -1.866283000 | -1.500173000 | 3.356876000  |
| C  | 2.216272000  | -0.875577000 | 3.361184000  |
| C  | -0.365779000 | 2.348346000  | 3.358116000  |
| C  | -1.399343000 | -0.240985000 | 3.870678000  |
| C  | 0.890338000  | -1.098771000 | 3.872659000  |
| C  | 0.490368000  | 1.319748000  | 3.874984000  |
| C  | -0.005656000 | -0.007566000 | 4.089264000  |
| N  | 0.128325000  | 0.204157000  | -0.007861000 |
| Ho | -1.119039000 | -1.562934000 | -0.017950000 |
| Sc | 2.076515000  | 0.101470000  | -0.251876000 |
| Sc | -0.716705000 | 1.974949000  | 0.149342000  |

**ErSc<sub>2</sub>N@C<sub>80</sub>**

|   |              |              |              |
|---|--------------|--------------|--------------|
| C | -3.013898000 | -1.252155000 | 2.516467000  |
| C | 2.572618000  | -1.997090000 | 2.528225000  |
| C | 0.421233000  | 3.219541000  | 2.510184000  |
| C | -3.317468000 | -2.074763000 | 1.378155000  |
| C | 3.391339000  | -1.836175000 | 1.371395000  |
| C | -0.136846000 | 3.924536000  | 1.391764000  |
| C | -2.496748000 | -3.250841000 | 1.126597000  |
| C | 3.969225000  | -0.533867000 | 1.098838000  |
| C | -1.571766000 | 3.799459000  | 1.141148000  |
| C | -3.876549000 | -1.403166000 | 0.237629000  |
| C | 3.117972000  | -2.669220000 | 0.245860000  |
| C | 0.726743000  | 4.056056000  | 0.244682000  |
| C | -3.248396000 | 0.173374000  | 2.515991000  |
| C | 1.454862000  | -2.910713000 | 2.519046000  |
| C | 1.777086000  | 2.710863000  | 2.513169000  |
| C | -0.254722000 | -3.940467000 | 1.093381000  |
| C | 3.528641000  | 1.753751000  | 1.084789000  |
| C | -3.254216000 | 2.156007000  | 1.086257000  |
| C | -3.741592000 | 0.826311000  | 1.356317000  |
| C | 1.140483000  | -3.678036000 | 1.364060000  |
| C | 2.600134000  | 2.828125000  | 1.361237000  |
| C | -4.097503000 | 0.023469000  | 0.232748000  |
| C | 2.017898000  | -3.589903000 | 0.240847000  |
| C | 2.076399000  | 3.534895000  | 0.240934000  |
| C | -3.556570000 | -1.813200000 | -1.119372000 |
| C | 3.304252000  | -2.168428000 | -1.102641000 |
| C | 0.218570000  | 3.961428000  | -1.112482000 |
| C | -2.687420000 | -2.932378000 | -1.393188000 |
| C | 3.864709000  | -0.873466000 | -1.386802000 |
| C | -1.180487000 | 3.745700000  | -1.387123000 |
| C | -1.797779000 | -2.737298000 | -2.510164000 |
| C | 3.262240000  | -0.200411000 | -2.511770000 |
| C | -1.465088000 | 2.901016000  | -2.512479000 |
| C | -3.573239000 | -0.617886000 | -1.942374000 |
| C | 2.296749000  | -2.794982000 | -1.931975000 |
| C | 1.258361000  | 3.381629000  | -1.932812000 |
| C | 0.357519000  | -2.373835000 | -3.358915000 |
| C | 1.860396000  | 1.484355000  | -3.350112000 |
| C | -2.232793000 | 0.861115000  | -3.369571000 |
| C | -2.688065000 | -0.458702000 | -3.053158000 |
| C | 1.727561000  | -2.109360000 | -3.045325000 |
| C | 0.948664000  | 2.543001000  | -3.046947000 |
| C | -1.822396000 | -1.555157000 | -3.347519000 |
| C | 2.247124000  | -0.812066000 | -3.342456000 |
| C | -0.429602000 | 2.340032000  | -3.348364000 |
| C | -0.779811000 | -4.097322000 | -0.244002000 |
| C | 3.971733000  | 1.391323000  | -0.247548000 |

|    |              |              |              |
|----|--------------|--------------|--------------|
| C  | -3.108665000 | 2.671355000  | -0.247484000 |
| C  | 0.113342000  | -3.869457000 | -1.365705000 |
| C  | 3.299284000  | 2.032038000  | -1.364908000 |
| C  | -3.387501000 | 1.806538000  | -1.375445000 |
| C  | -3.918396000 | 0.503421000  | -1.110967000 |
| C  | 1.508721000  | -3.669359000 | -1.105245000 |
| C  | 2.403907000  | 3.128351000  | -1.099873000 |
| C  | -0.433779000 | -3.230196000 | -2.516650000 |
| C  | 3.002996000  | 1.228073000  | -2.508401000 |
| C  | -2.579047000 | 1.973729000  | -2.530410000 |
| C  | -0.498900000 | -1.334140000 | -3.861876000 |
| C  | 1.392513000  | 0.224754000  | -3.854209000 |
| C  | -0.899858000 | 1.082345000  | -3.864601000 |
| C  | -0.002782000 | -0.008889000 | -4.082908000 |
| C  | -2.187559000 | -3.701082000 | -0.246629000 |
| C  | 4.288093000  | -0.050607000 | -0.248420000 |
| C  | -2.092291000 | 3.711761000  | -0.244678000 |
| C  | 0.418708000  | -2.356485000 | 3.353265000  |
| C  | 1.811642000  | 1.539748000  | 3.350460000  |
| C  | -2.254083000 | 0.796472000  | 3.353969000  |
| C  | -0.961038000 | -2.556425000 | 3.051481000  |
| C  | 2.665359000  | 0.438361000  | 3.045918000  |
| C  | -1.731640000 | 2.090119000  | 3.052782000  |
| C  | -1.295831000 | -3.408225000 | 1.927935000  |
| C  | 3.540076000  | 0.579028000  | 1.907043000  |
| C  | -2.293473000 | 2.810589000  | 1.928321000  |
| C  | -1.866017000 | -1.499303000 | 3.358116000  |
| C  | 2.216766000  | -0.875459000 | 3.362095000  |
| C  | -0.365614000 | 2.348418000  | 3.358663000  |
| C  | -1.399272000 | -0.240295000 | 3.872079000  |
| C  | 0.890803000  | -1.098481000 | 3.873482000  |
| C  | 0.490625000  | 1.319951000  | 3.875757000  |
| C  | -0.005394000 | -0.007231000 | 4.090178000  |
| N  | 0.119412000  | 0.191197000  | -0.008676000 |
| Er | -1.121756000 | -1.569913000 | -0.017944000 |
| Sc | 2.072252000  | 0.095949000  | -0.251284000 |
| Sc | -0.721165000 | 1.968256000  | 0.149280000  |

**TmSc<sub>2</sub>N@C<sub>80</sub>**

|   |              |              |              |
|---|--------------|--------------|--------------|
| C | -3.013091000 | -1.251082000 | 2.517304000  |
| C | 2.573159000  | -1.995951000 | 2.528781000  |
| C | 0.421721000  | 3.219468000  | 2.511512000  |
| C | -3.315373000 | -2.072324000 | 1.378103000  |
| C | 3.393072000  | -1.834913000 | 1.372276000  |
| C | -0.136135000 | 3.920692000  | 1.390857000  |
| C | -2.494785000 | -3.247861000 | 1.126237000  |
| C | 3.974996000  | -0.534016000 | 1.101436000  |
| C | -1.569936000 | 3.795330000  | 1.139751000  |
| C | -3.875202000 | -1.401507000 | 0.237630000  |
| C | 3.117586000  | -2.666337000 | 0.245428000  |
| C | 0.726634000  | 4.054348000  | 0.244283000  |
| C | -3.247801000 | 0.174188000  | 2.516556000  |
| C | 1.455552000  | -2.909460000 | 2.519405000  |
| C | 1.777021000  | 2.710853000  | 2.513780000  |
| C | -0.253520000 | -3.936954000 | 1.092847000  |
| C | 3.525904000  | 1.752453000  | 1.085118000  |
| C | -3.254108000 | 2.155652000  | 1.086182000  |
| C | -3.741720000 | 0.826530000  | 1.356755000  |
| C | 1.141437000  | -3.676147000 | 1.364040000  |
| C | 2.599219000  | 2.827785000  | 1.361199000  |
| C | -4.097939000 | 0.024398000  | 0.232772000  |
| C | 2.017767000  | -3.587500000 | 0.240406000  |
| C | 2.076523000  | 3.534850000  | 0.240436000  |
| C | -3.555287000 | -1.811508000 | -1.119433000 |
| C | 3.304898000  | -2.167510000 | -1.103677000 |
| C | 0.218093000  | 3.961282000  | -1.112878000 |
| C | -2.686280000 | -2.930511000 | -1.393350000 |
| C | 3.864434000  | -0.872022000 | -1.387455000 |
| C | -1.180979000 | 3.746763000  | -1.387742000 |
| C | -1.796915000 | -2.735546000 | -2.510314000 |
| C | 3.259954000  | -0.199522000 | -2.511084000 |
| C | -1.465120000 | 2.901246000  | -2.512616000 |
| C | -3.573245000 | -0.616782000 | -1.942778000 |
| C | 2.297428000  | -2.794004000 | -1.932933000 |
| C | 1.258159000  | 3.382342000  | -1.933594000 |
| C | 0.357814000  | -2.373058000 | -3.360343000 |
| C | 1.860432000  | 1.485323000  | -3.352273000 |
| C | -2.232950000 | 0.861776000  | -3.370373000 |
| C | -2.688200000 | -0.457937000 | -3.053810000 |
| C | 1.727810000  | -2.108562000 | -3.046543000 |
| C | 0.948598000  | 2.543618000  | -3.047878000 |
| C | -1.822128000 | -1.553998000 | -3.348214000 |
| C | 2.246847000  | -0.811426000 | -3.343880000 |
| C | -0.429741000 | 2.340499000  | -3.349056000 |
| C | -0.778467000 | -4.093928000 | -0.244384000 |
| C | 3.964089000  | 1.388410000  | -0.247325000 |

|    |              |              |              |
|----|--------------|--------------|--------------|
| C  | -3.109340000 | 2.671611000  | -0.247609000 |
| C  | 0.114143000  | -3.867279000 | -1.366303000 |
| C  | 3.294083000  | 2.030425000  | -1.364459000 |
| C  | -3.387954000 | 1.806925000  | -1.375641000 |
| C  | -3.919176000 | 0.504204000  | -1.111204000 |
| C  | 1.509443000  | -3.667793000 | -1.105708000 |
| C  | 2.403633000  | 3.129776000  | -1.100657000 |
| C  | -0.433120000 | -3.228884000 | -2.517440000 |
| C  | 3.000581000  | 1.228521000  | -2.508943000 |
| C  | -2.579077000 | 1.973867000  | -2.530554000 |
| C  | -0.498775000 | -1.333377000 | -3.863236000 |
| C  | 1.392658000  | 0.225384000  | -3.856473000 |
| C  | -0.900032000 | 1.083097000  | -3.865723000 |
| C  | -0.002673000 | -0.008112000 | -4.084593000 |
| C  | -2.186190000 | -3.698553000 | -0.246788000 |
| C  | 4.287822000  | -0.050266000 | -0.248366000 |
| C  | -2.092196000 | 3.711304000  | -0.245041000 |
| C  | 0.419550000  | -2.355618000 | 3.354078000  |
| C  | 1.812282000  | 1.539935000  | 3.351645000  |
| C  | -2.253597000 | 0.796970000  | 3.354902000  |
| C  | -0.960233000 | -2.554860000 | 3.052236000  |
| C  | 2.666349000  | 0.438798000  | 3.047565000  |
| C  | -1.730839000 | 2.090155000  | 3.053564000  |
| C  | -1.294252000 | -3.404822000 | 1.927350000  |
| C  | 3.541990000  | 0.578817000  | 1.908744000  |
| C  | -2.292028000 | 2.808470000  | 1.927641000  |
| C  | -1.865716000 | -1.498613000 | 3.359689000  |
| C  | 2.217574000  | -0.874991000 | 3.363898000  |
| C  | -0.365184000 | 2.349042000  | 3.360385000  |
| C  | -1.399041000 | -0.239722000 | 3.873698000  |
| C  | 0.891616000  | -1.097953000 | 3.875105000  |
| C  | 0.491099000  | 1.320371000  | 3.877299000  |
| C  | -0.004945000 | -0.006687000 | 4.091855000  |
| N  | 0.112498000  | 0.178408000  | -0.009858000 |
| Tm | -1.127246000 | -1.574406000 | -0.021364000 |
| Sc | 2.070975000  | 0.065930000  | -0.230004000 |
| Sc | -0.724905000 | 1.962484000  | 0.136282000  |

**LuSc<sub>2</sub>N@C<sub>80</sub>**

|   |              |              |              |
|---|--------------|--------------|--------------|
| C | -3.013521000 | -1.250367000 | 2.519673000  |
| C | 2.573257000  | -1.996111000 | 2.529320000  |
| C | 0.421757000  | 3.219270000  | 2.511921000  |
| C | -3.313526000 | -2.069592000 | 1.378744000  |
| C | 3.392785000  | -1.835289000 | 1.372445000  |
| C | -0.136143000 | 3.919311000  | 1.390641000  |
| C | -2.493821000 | -3.246112000 | 1.126940000  |
| C | 3.974127000  | -0.534248000 | 1.101446000  |
| C | -1.569658000 | 3.794128000  | 1.139554000  |
| C | -3.874126000 | -1.398700000 | 0.237811000  |
| C | 3.118172000  | -2.667161000 | 0.245505000  |
| C | 0.726405000  | 4.053086000  | 0.244197000  |
| C | -3.248409000 | 0.174801000  | 2.517355000  |
| C | 1.456190000  | -2.910179000 | 2.520692000  |
| C | 1.776953000  | 2.710850000  | 2.514118000  |
| C | -0.251776000 | -3.934420000 | 1.092835000  |
| C | 3.524679000  | 1.751975000  | 1.085045000  |
| C | -3.254402000 | 2.155537000  | 1.086419000  |
| C | -3.743237000 | 0.827039000  | 1.357429000  |
| C | 1.142995000  | -3.676336000 | 1.364515000  |
| C | 2.598974000  | 2.827764000  | 1.361376000  |
| C | -4.099744000 | 0.026016000  | 0.232599000  |
| C | 2.019329000  | -3.589183000 | 0.240382000  |
| C | 2.076289000  | 3.534345000  | 0.240373000  |
| C | -3.553216000 | -1.808280000 | -1.119787000 |
| C | 3.304825000  | -2.167514000 | -1.103714000 |
| C | 0.217964000  | 3.960319000  | -1.112922000 |
| C | -2.683592000 | -2.927091000 | -1.393689000 |
| C | 3.864093000  | -0.872046000 | -1.387473000 |
| C | -1.180809000 | 3.745671000  | -1.387604000 |
| C | -1.795608000 | -2.734369000 | -2.511989000 |
| C | 3.259482000  | -0.199490000 | -2.510989000 |
| C | -1.465062000 | 2.900741000  | -2.512663000 |
| C | -3.574370000 | -0.615181000 | -1.944166000 |
| C | 2.297859000  | -2.794344000 | -1.933430000 |
| C | 1.258159000  | 3.382469000  | -1.934030000 |
| C | 0.358369000  | -2.373614000 | -3.362577000 |
| C | 1.860473000  | 1.485370000  | -3.352738000 |
| C | -2.233162000 | 0.862090000  | -3.371203000 |
| C | -2.689089000 | -0.457524000 | -3.055466000 |
| C | 1.728146000  | -2.108913000 | -3.047367000 |
| C | 0.948567000  | 2.543692000  | -3.048218000 |
| C | -1.822187000 | -1.553370000 | -3.350026000 |
| C | 2.246683000  | -0.811388000 | -3.344084000 |
| C | -0.429709000 | 2.340440000  | -3.349351000 |
| C | -0.776840000 | -4.092722000 | -0.244846000 |
| C | 3.962337000  | 1.387709000  | -0.247274000 |

|    |              |              |              |
|----|--------------|--------------|--------------|
| C  | -3.109539000 | 2.671303000  | -0.247616000 |
| C  | 0.115711000  | -3.866648000 | -1.367209000 |
| C  | 3.293156000  | 2.030077000  | -1.364442000 |
| C  | -3.388887000 | 1.807168000  | -1.376134000 |
| C  | -3.921985000 | 0.505504000  | -1.112237000 |
| C  | 1.510951000  | -3.668960000 | -1.106113000 |
| C  | 2.403510000  | 3.129814000  | -1.100909000 |
| C  | -0.431806000 | -3.229321000 | -2.519643000 |
| C  | 3.000289000  | 1.228516000  | -2.509204000 |
| C  | -2.579210000 | 1.973818000  | -2.530827000 |
| C  | -0.498598000 | -1.333308000 | -3.865019000 |
| C  | 1.392723000  | 0.225458000  | -3.856966000 |
| C  | -0.900097000 | 1.083235000  | -3.866426000 |
| C  | -0.002614000 | -0.008037000 | -4.085371000 |
| C  | -2.184261000 | -3.695816000 | -0.246825000 |
| C  | 4.286694000  | -0.050463000 | -0.248260000 |
| C  | -2.091855000 | 3.710201000  | -0.244954000 |
| C  | 0.419963000  | -2.356038000 | 3.355431000  |
| C  | 1.812331000  | 1.540096000  | 3.352164000  |
| C  | -2.253812000 | 0.797288000  | 3.355699000  |
| C  | -0.960285000 | -2.554776000 | 3.054661000  |
| C  | 2.666165000  | 0.438850000  | 3.047896000  |
| C  | -1.730781000 | 2.090155000  | 3.054162000  |
| C  | -1.293222000 | -3.403117000 | 1.928509000  |
| C  | 3.541201000  | 0.578584000  | 1.908750000  |
| C  | -2.291942000 | 2.807895000  | 1.927760000  |
| C  | -1.866593000 | -1.498884000 | 3.362839000  |
| C  | 2.217552000  | -0.874900000 | 3.364226000  |
| C  | -0.365145000 | 2.349263000  | 3.361111000  |
| C  | -1.399415000 | -0.239641000 | 3.875275000  |
| C  | 0.891674000  | -1.097920000 | 3.875581000  |
| C  | 0.491098000  | 1.320488000  | 3.877783000  |
| C  | -0.005055000 | -0.006637000 | 4.092382000  |
| N  | 0.106564000  | 0.169678000  | -0.012355000 |
| Lu | -1.122728000 | -1.573171000 | -0.017416000 |
| Sc | 2.069629000  | 0.061541000  | -0.231244000 |
| Sc | -0.728243000 | 1.959621000  | 0.136344000  |
